# Supplementary material for: Aqueous phase semihydrogenation of alkynes over Ni–Fe bimetallic catalysts
Source: Royal Society of Chemistry journal article supplement (doi:10.1039/d0cy01153c), 2020-01-01
Supplement: d0cy01153c1.pdf [file d0cy01153c1.pdf]

## Supplementary Material

### Aqueous Phase Semihydrogenation of Alkynes over Ni-Fe Bimetallic catalysts

Rohit K. Rai<sup>a,c</sup>, Mahendra K. Awasthi<sup>a</sup>, Vipin K. Singh<sup>b</sup>, Sudipta Roy Barman<sup>b</sup>, Silke Behrens<sup>d</sup>,  
and Sanjay K. Singh<sup>\*a</sup>

<sup>a</sup>Catalysis Group, Discipline of Chemistry, Indian Institute of Technology Indore, Simrol, Indore  
453552, Madhya Pradesh, India

<sup>b</sup>UGC-DAE Consortium for Scientific Research, Khandwa Road, Indore 452001, Madhya  
Pradesh, India

<sup>c</sup>KAUST Catalysis Center and Division of Physical Sciences and Engineering, King Abdullah  
University of Science and Technology (KAUST), Thuwal, 23955-6900, Kingdom of Saudi Arabia.

<sup>d</sup>Institut für Katalyseforschung und –technologie (IKFT), Karlsruher Institut für Technologie  
(KIT), Hermann-von-Helmholtz-Platz 1, D-76344 Eggenstein-Leopoldshafen, Germany

E-mail: [sksingh@iiti.ac.in](mailto:sksingh@iiti.ac.in) (SKS)

## Table of Contents

|        |                                                                                           |         |
|--------|-------------------------------------------------------------------------------------------|---------|
| SI-1.  | Chemicals and Materials                                                                   | S3      |
| SI-2.  | Characterization and physical measurements                                                | S3      |
| SI-3.  | Preparation of catalysts                                                                  | S4      |
| SI-4.  | Catalytic semihydrogenation of alkynes                                                    | S4-S6   |
| SI-5.  | Characterization of catalysts                                                             | S6-S17  |
| SI-6.  | CS <sub>2</sub> poisoning experiment                                                      | S18     |
| SI-7.  | Deuterium labeling experiments                                                            | S19-S23 |
| SI-8.  | H <sub>2</sub> -TPD experiment                                                            | S24-S25 |
| SI-9.  | XPS survey scan of different catalysts                                                    | S26-S28 |
| SI-10. | Hydrogenation of terminal alkynes over Ni <sub>1</sub> Fe <sub>3</sub> catalyst           | S29     |
| SI-11. | ICP experiment under optimized reaction condition                                         | S30     |
| SI-12. | Screening of additives and hydrogen source for the semihydrogenation of diphenylacetylene | S31     |
| SI-13. | Spectral data of semihydrogenated products                                                | S32-S35 |
| SI-14. | GC-MS spectra for semihydrogenated products                                               | S36-S40 |
| SI-15. | Spectra of semihydrogenated products                                                      | S41-S51 |
| SI-16. | Reference                                                                                 | S52     |

## SI-1. Chemicals and Materials

Polyvinylpyrrolidone (PVP ~ 40,000 mwt, Sigma-Aldrich, 99%), nickel chloride hexahydrate ( $\text{NiCl}_2 \cdot 6\text{H}_2\text{O}$ , 98%),  $\text{FeSO}_4 \cdot 7\text{H}_2\text{O}$ , and sodium borohydride were purchased from Alfa Aesar. All chemicals were of analytical grade and used without further purification. Substrates **1a**, **1f**, **1m** and **1n** are commercially available. Remaining substrates was prepared according to the literature procedures.

## SI-2. Characterization and physical measurements

High purity metal salts and chemicals were used for the experiments. NMR spectra were recorded with a Bruker Avance 400 (400 MHz and 600 MHz) spectrometer. Chemical shifts are reported in ppm relative to the center of the singlet at  $\delta = 7.26$  ppm for  $\text{CDCl}_3$ ,  $^{13}\text{C}$  NMR in  $\text{CDCl}_3$  at the center of triplet at  $\delta = 77.0$  ppm. Powder X-ray diffraction (XRD) measurements were performed on a Bruker D8 Advance reflection diffractometer equipped with a LynxEye energy-discriminating position-sensitive detector (1D-PSD) using  $\text{Cu K}\alpha_{1+2}$  radiation. Scanning electron microscopy (SEM) and energy-dispersive X-ray spectroscopy (EDS) were recorded by using a Carl Zeiss Supra-55 scanning electron microscope and an EDS Oxford instruments model X-Max, energy-dispersive X-ray spectrometer (Au-sputtered samples were used). High resolution transmission electron microscopy (HR-TEM) images were obtained by using a JEM-1400 microscope (JEOL) and Titan Themis-Z microscope from Thermo-Fisher Scientific by operating it at the accelerating voltage of 300 kV. Inductively coupled plasma optical emission spectroscopy (ICP-OES) on a Thermo-Electron 3580 instrument and ARCOS (Spectro, Kleve, Germany). For ICP-OES analysis, 5 mg catalysts were digested overnight in 7 mL of aqua regia solution. Further, the digested solution was diluted to 20 mL using deionized water and the solution was analyzed using ICP-OES. ICP-OES analysis technique has a detection limit of 0.01 PPM. Before the ICP analysis, the synthesized catalysts were washed with copious amount of deionized water and ethanol to remove any unreacted metal salts and other impurities. After washing, catalysts were dried in vacuum oven for overnight. The dynamic light scattering (DLS) studies were performed in water-

ethanol mixture on a Micromeritics Nanoplus 3 instrument. GC-MS analysis was performed on a Shimadzu GCMS-QP2010 Ultra and GC-2010 Plus system in EI (electron impact) mode using Rtx5MS column, and an Agilent 7890A series instrument coupled with an Agilent 5975C Series instrument equipped with a column HP-5MS. H<sub>2</sub>-TPD were obtained on AutoChem II 2920 apparatus from Micromeritics equipped with Cirrus 2 mass spectrometry.

### **SI-3. Preparation of catalysts**

#### **Syntheses of Ni<sub>1</sub>Fe<sub>1</sub>, Ni<sub>3</sub>Fe<sub>1</sub> and Ni<sub>1</sub>Fe<sub>3</sub> catalysts**

Bimetallic Ni-Fe catalysts with different Ni/Fe molar ratio were synthesized using polyvinylpyrrolidone (PVP) stabilized aqueous phase co-reduction process.<sup>S1</sup> Typically, 0.012 g of NiCl<sub>2</sub>·6H<sub>2</sub>O and 0.042 g of FeSO<sub>4</sub>·7H<sub>2</sub>O were dissolved in 5 mL of distilled water containing 0.100 g of PVP and sonicated for 5 min. An aqueous solution of sodium borohydride (5 mL, 0.050 g) was added drop wise to the above mixture and sonicated again for 5 min to obtain a black suspension of Ni<sub>1</sub>Fe<sub>3</sub> catalyst, which was magnetically separated out under inert gas protection using a Schlenk line, and washed with copious amount of deionized water and ethanol. Analogously, Ni<sub>1</sub>Fe<sub>1</sub> and Ni<sub>3</sub>Fe<sub>1</sub> catalysts along with the monometallic Ni and Fe catalysts were also synthesized. It should be noted that all catalysts were magnetically separated out under inert gas protection in a Schlenk line except Ni catalyst, which is separated out by centrifugation at 5000 rpm for 10 min. For characterization, washed catalysts were dried in vacuum and then used for SEM, TEM, EDX, powder XRD, XPS, H<sub>2</sub>-TPD and ICP-OES analyses.

**Synthesis of Ni/Fe<sub>3</sub>O<sub>4</sub> catalyst.** In round bottom flask, Fe<sub>3</sub>O<sub>4</sub> magnetic nanoparticles (0.0173 g), NiCl<sub>2</sub>·6H<sub>2</sub>O (0.006 g) and PVP (0.0125 g) were dispersed in water (5 mL). An aqueous solution of sodium borohydride (5 mL, 0.0125 g) was added drop wise to the above mixture and sonicated for 5 min to obtain the black suspension of Ni/Fe<sub>3</sub>O<sub>4</sub>. The obtained solid was magnetically separated and washed with ethanol.

### **Bulk scale synthesis of Ni<sub>1</sub>Fe<sub>3</sub> catalysts**

Typically, 0.12 g of NiCl<sub>2</sub>·6H<sub>2</sub>O and 0.42 g of FeSO<sub>4</sub>·7H<sub>2</sub>O were dissolved in 50 mL of distilled water containing 1.0 g of PVP and sonicated for 10 min. An aqueous solution of sodium borohydride (50 mL, 0.50 g) was added drop wise to the above mixture and sonicated again for 10 min to obtain a black suspension of Ni<sub>1</sub>Fe<sub>3</sub> catalyst, which was magnetically separated out under inert gas protection in a Schlenk line and washed with copious amount of deionized water and ethanol.<sup>S1</sup>

### **SI-4. Catalytic semihydrogenation of alkynes**

Reaction flask was charged with the freshly prepared catalyst (10.0 mol%) dispersed in water/ethanol (20 mL, 1:1 v/v), and was purged with N<sub>2</sub> gas. After that alkynes (1.0 mmol) and *n*-butyl amine (0.55 mmol) was added in the solution and the reaction mixture was stirred at 40 °C equipped with a H<sub>2</sub> balloon. After completion of the reaction, catalyst was magnetically separated from the reaction mixture. The reaction mixture was extracted with dichloromethane (3 × 5 mL), and the combined organic layer was dried over anhydrous Na<sub>2</sub>SO<sub>4</sub>, filtered, and concentrated under reduced pressure. Products were characterized by <sup>1</sup>H NMR, <sup>13</sup>C NMR and GC-MS.

### **General procedure for the synthesis of alkynes**

For the synthesis of different internal alkynes, we followed previously reported procedure with minor modification.<sup>S2,S3</sup> In general, a dry round bottle flask was charged with the corresponding aryl iodide (5 equiv.), CuI (1-2 mol%), PdCl<sub>2</sub>(PPh<sub>3</sub>)<sub>2</sub> (1-2 mol%), PPh<sub>3</sub> (1-2 mol%), phenylacetylene (5.5 equiv.) and triethylamine (10 mL) in dry THF (10 mL). Reaction mixture was flushed thrice with N<sub>2</sub> gas and stirred overnight at 70 °C under N<sub>2</sub> atmosphere. After completion of the reaction, 10 mL of deionized water was added to the reaction mixture and was extracted with ethyl acetate (5 × 15 mL). The combined organic fractions were dried over

anhydrous  $\text{Na}_2\text{SO}_4$  and all the volatiles were removed under reduced pressure. The obtained crude products were purified by column chromatography using ethyl acetate and hexane as the eluent.  $^1\text{H}$  NMR and  $^{13}\text{C}$  NMR of the obtained products matches well with the reported literature data.<sup>S2-</sup>

S5

### SI-5. Characterization of catalyst

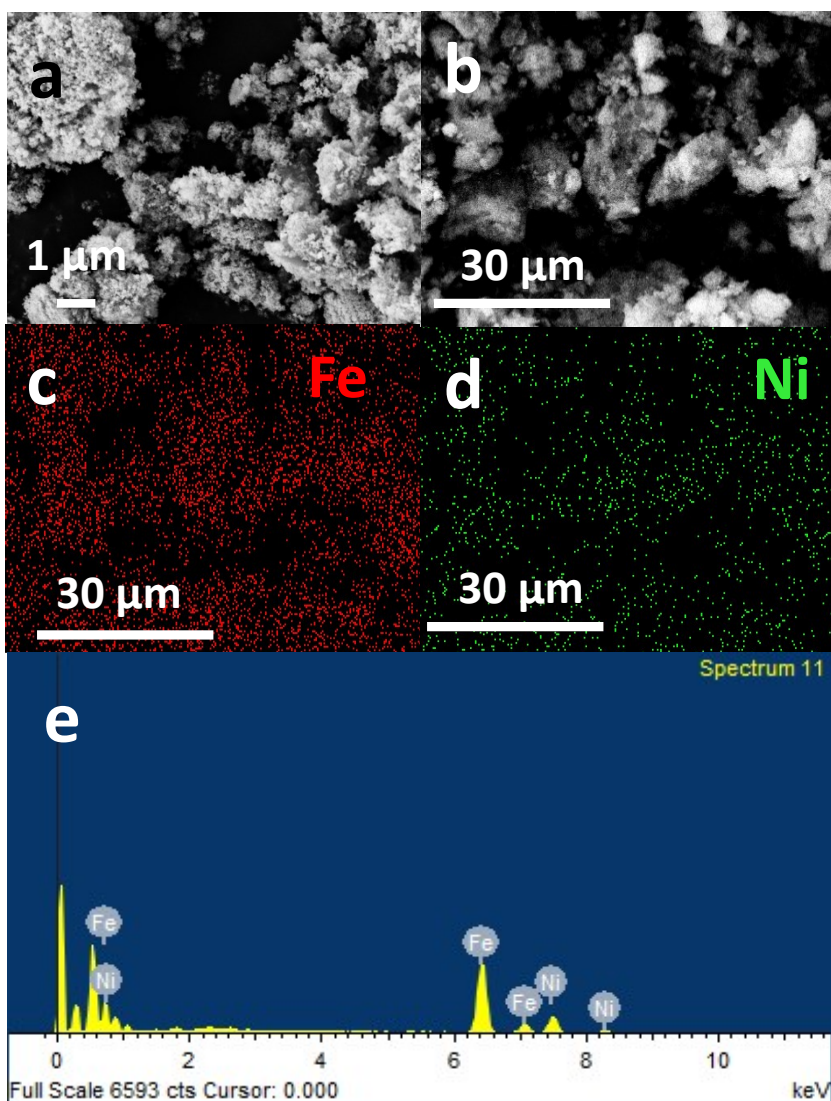

**Fig. S1** (a) SEM image, (b-d) SEM image and the corresponding elemental mapping, and (e) SEM-EDS of  $\text{Ni}_1\text{Fe}_3$  catalyst.

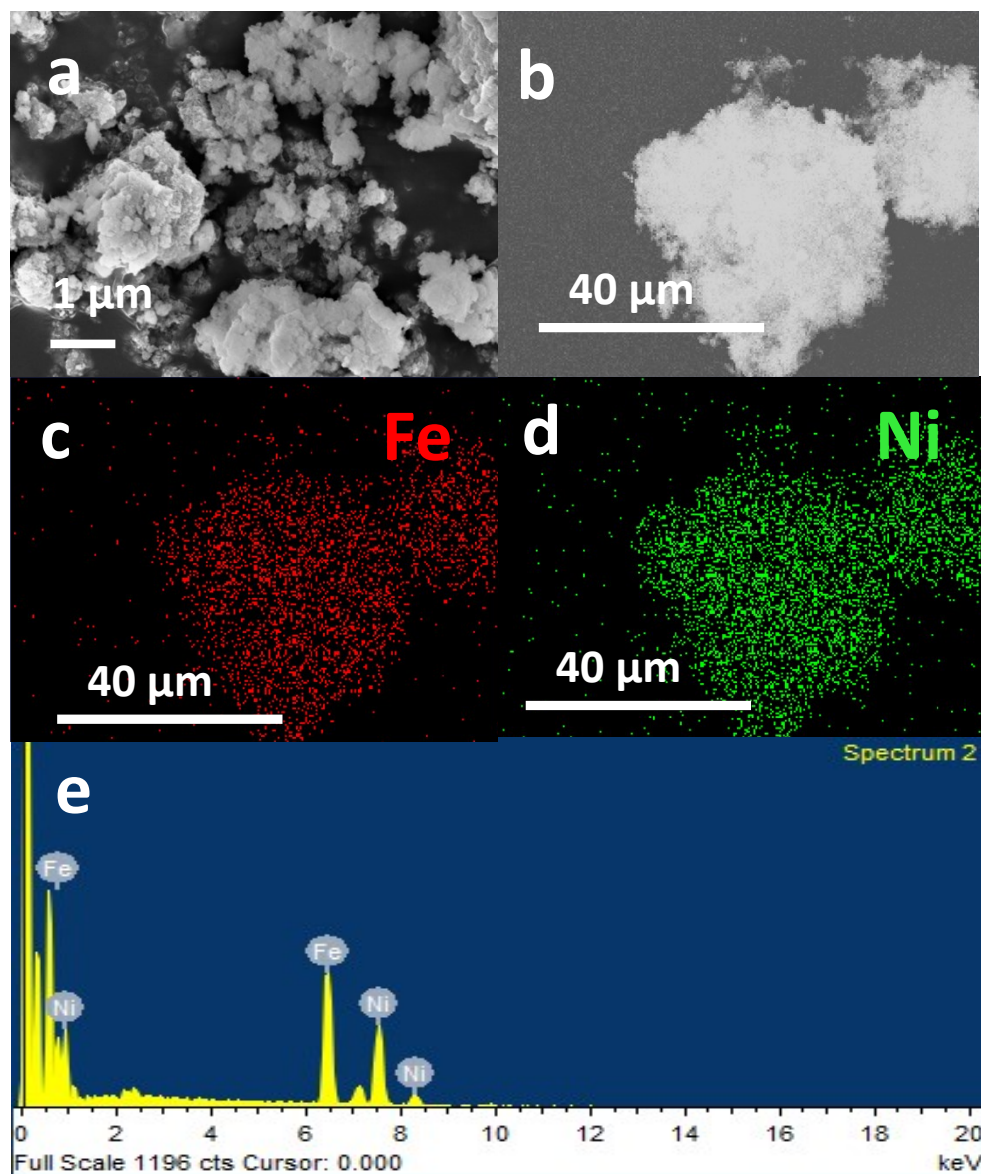

**Fig. S2** (a) SEM image, (b-d) SEM image and the corresponding elemental mapping, and (e) SEM-EDS of  $\text{Ni}_1\text{Fe}_1$  catalyst.

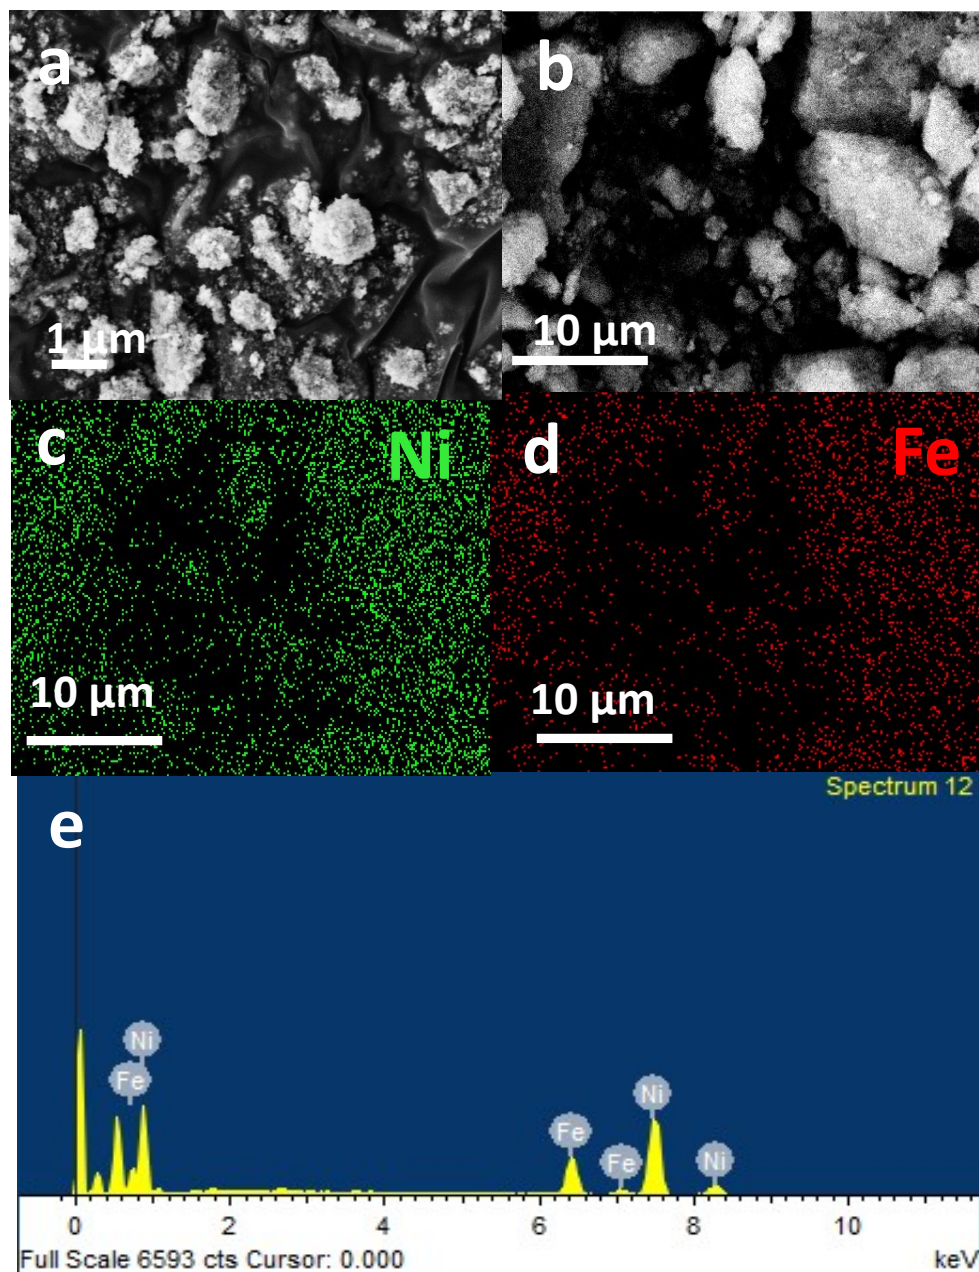

**Fig. S3** (a) SEM image, (b-d) SEM image and the corresponding elemental mapping, and (e) SEM-EDS of Ni<sub>3</sub>Fe<sub>1</sub> catalyst.



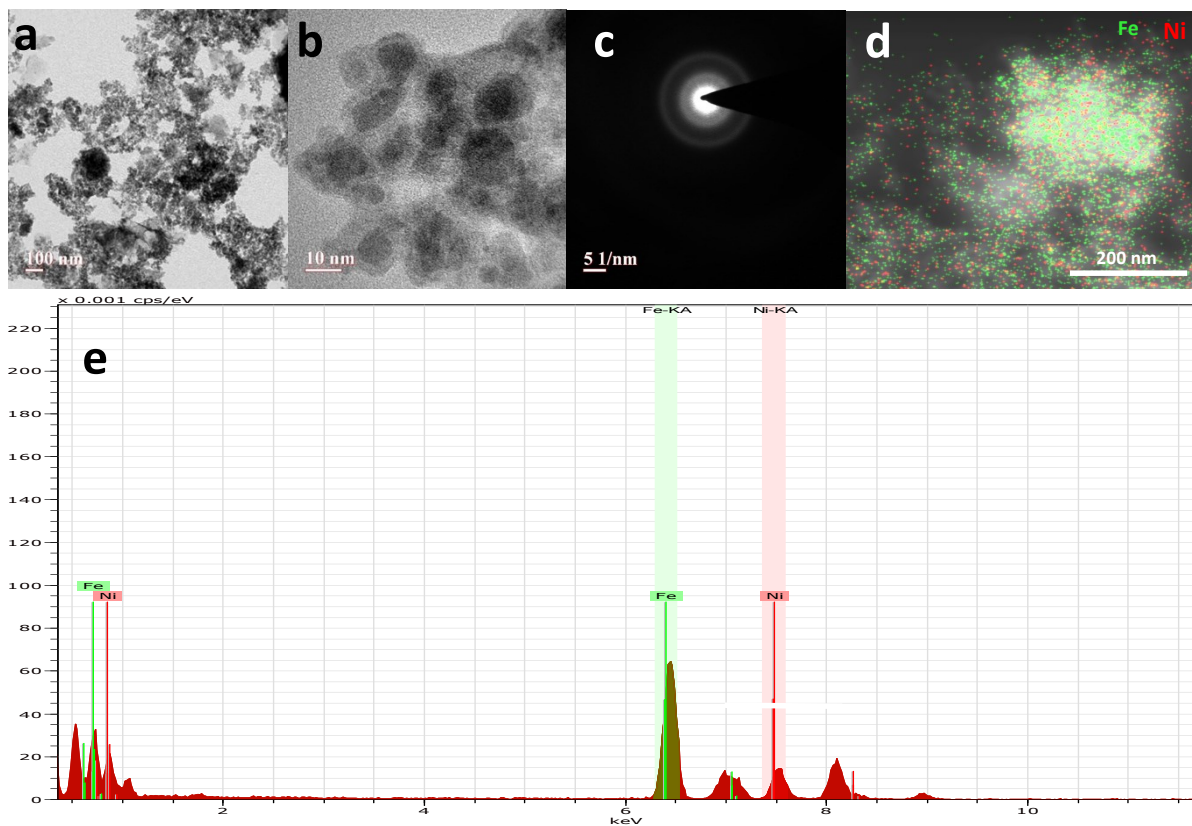

**Fig. S4** (a,b) TEM images. (c) SEAD. (d) Overlay image of elemental mapping. (e) TEM-EDS of  $\text{Ni}_1\text{Fe}_3$  fresh catalyst.

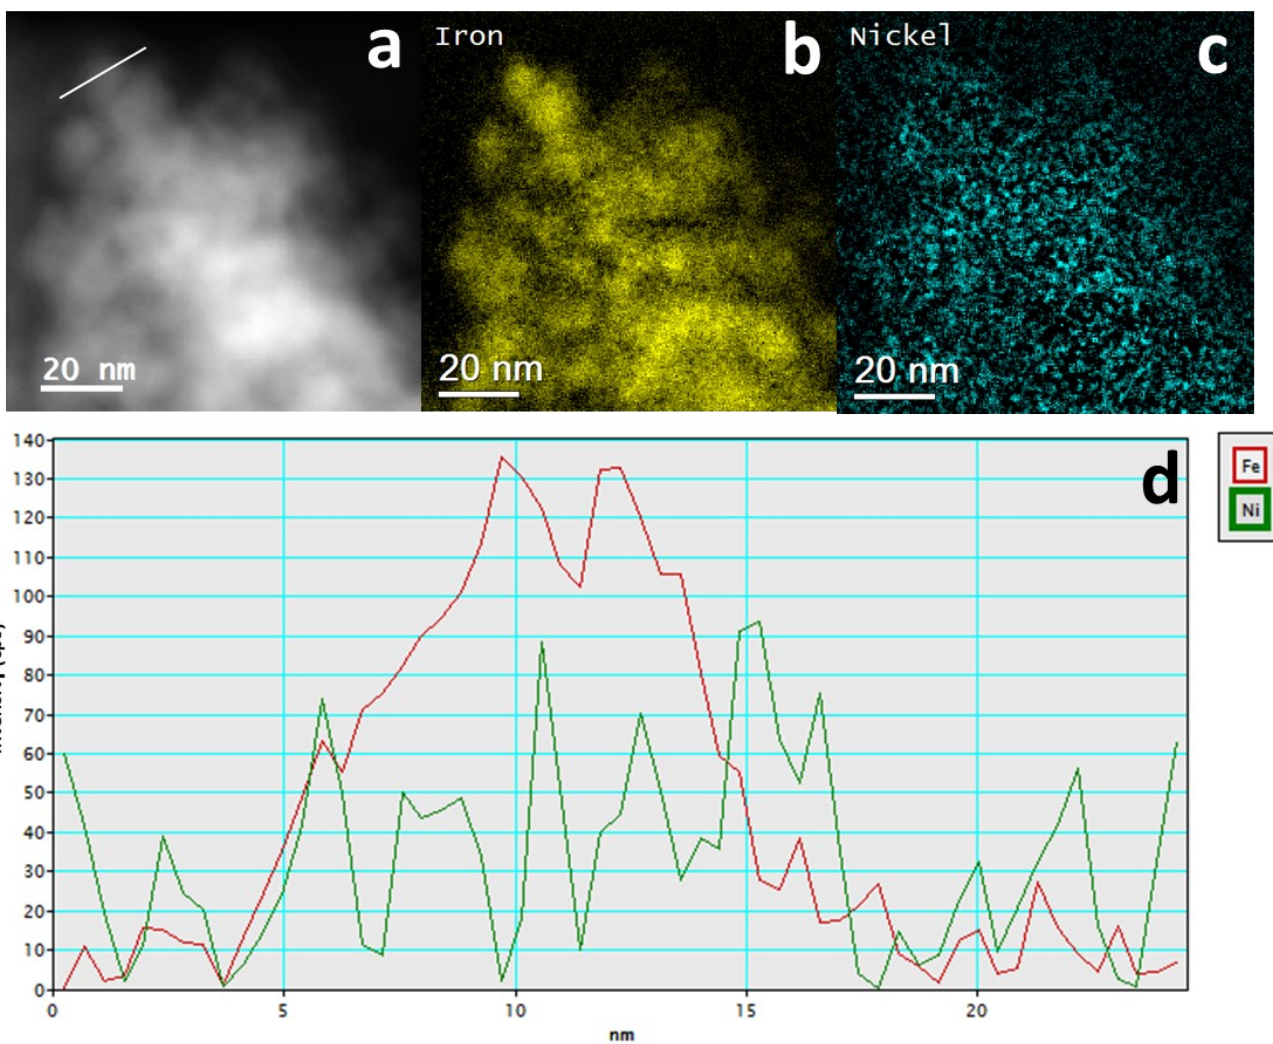

**Fig. S5** (a) TEM image and the corresponding (b-c) elemental mapping for Ni and Fe metals, and (d) the line scanning profile of  $\text{Ni}_1\text{Fe}_3$  catalyst.

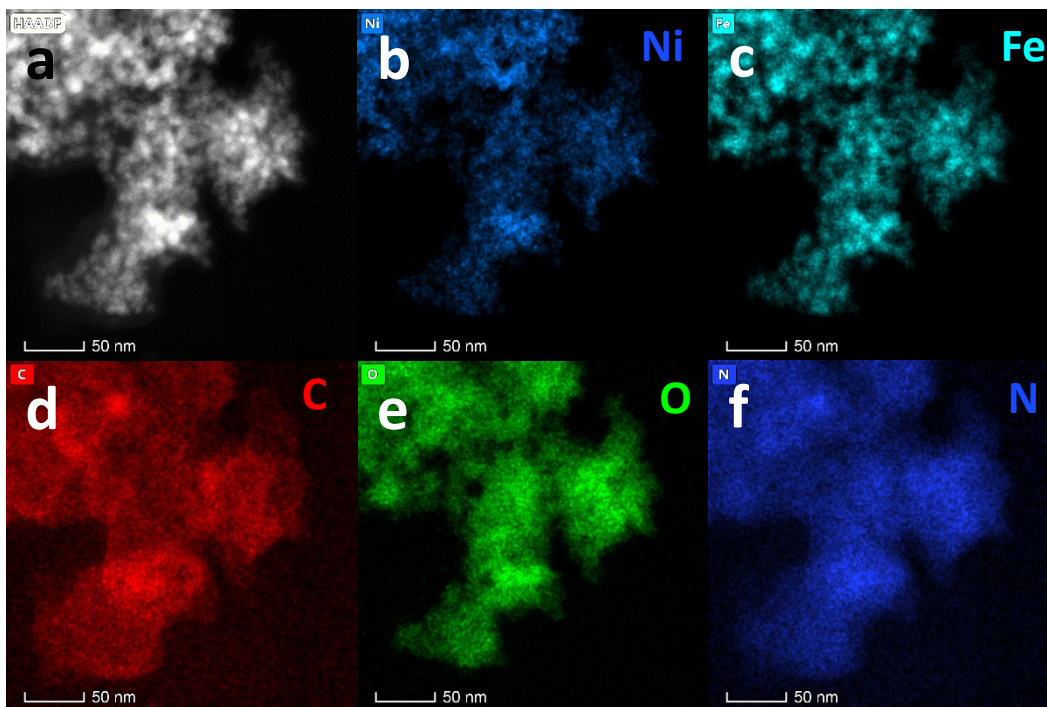

**Fig. S6** (a) HAADF-TEM image and the corresponding (b-f) EDS elemental mapping of  $\text{Ni}_1\text{Fe}_3$  catalyst.

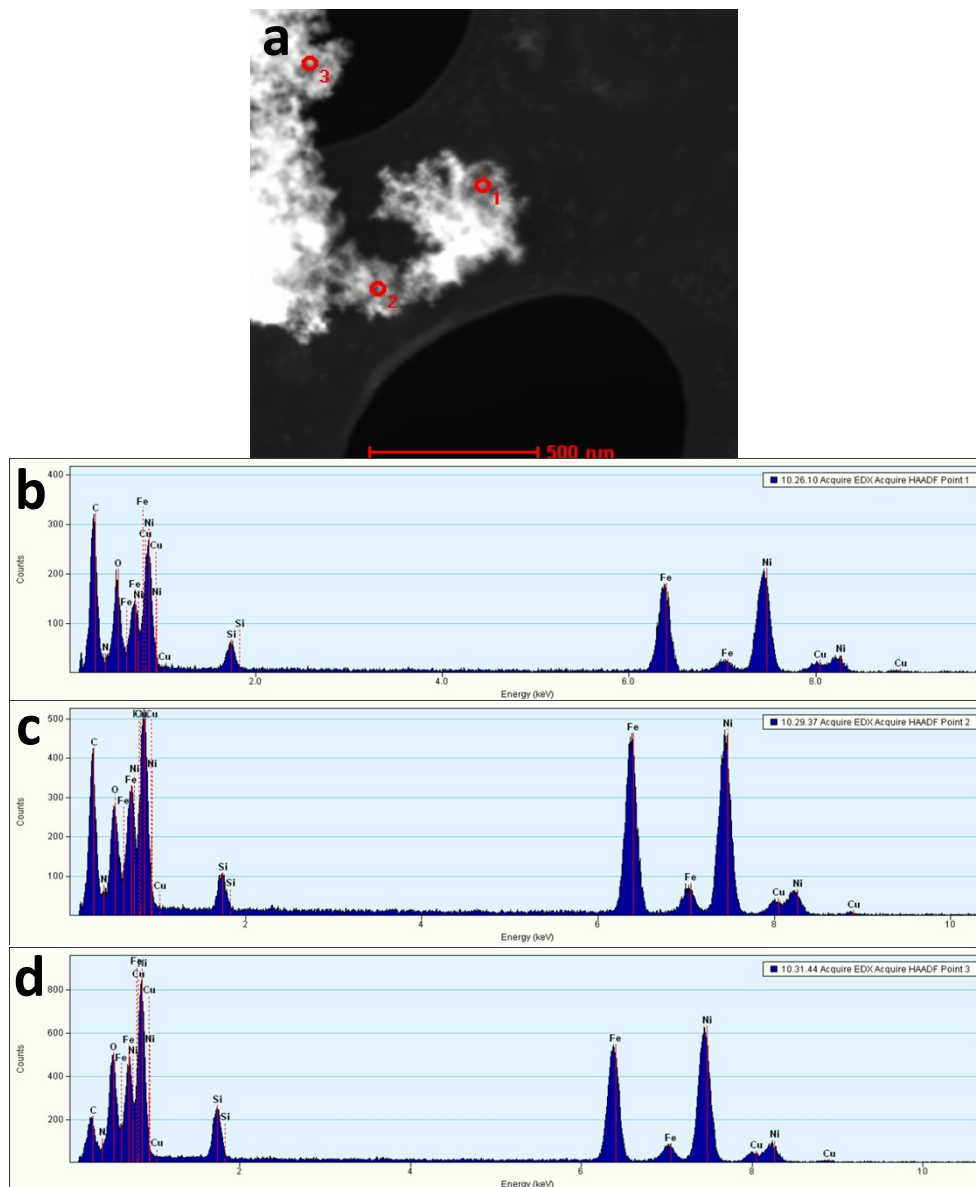

**Fig. S7** (a) HAADF-STEM image with the corresponding (b-d) EDS spectra of randomly chosen nanoparticles of  $\text{Ni}_1\text{Fe}_1$  catalyst.

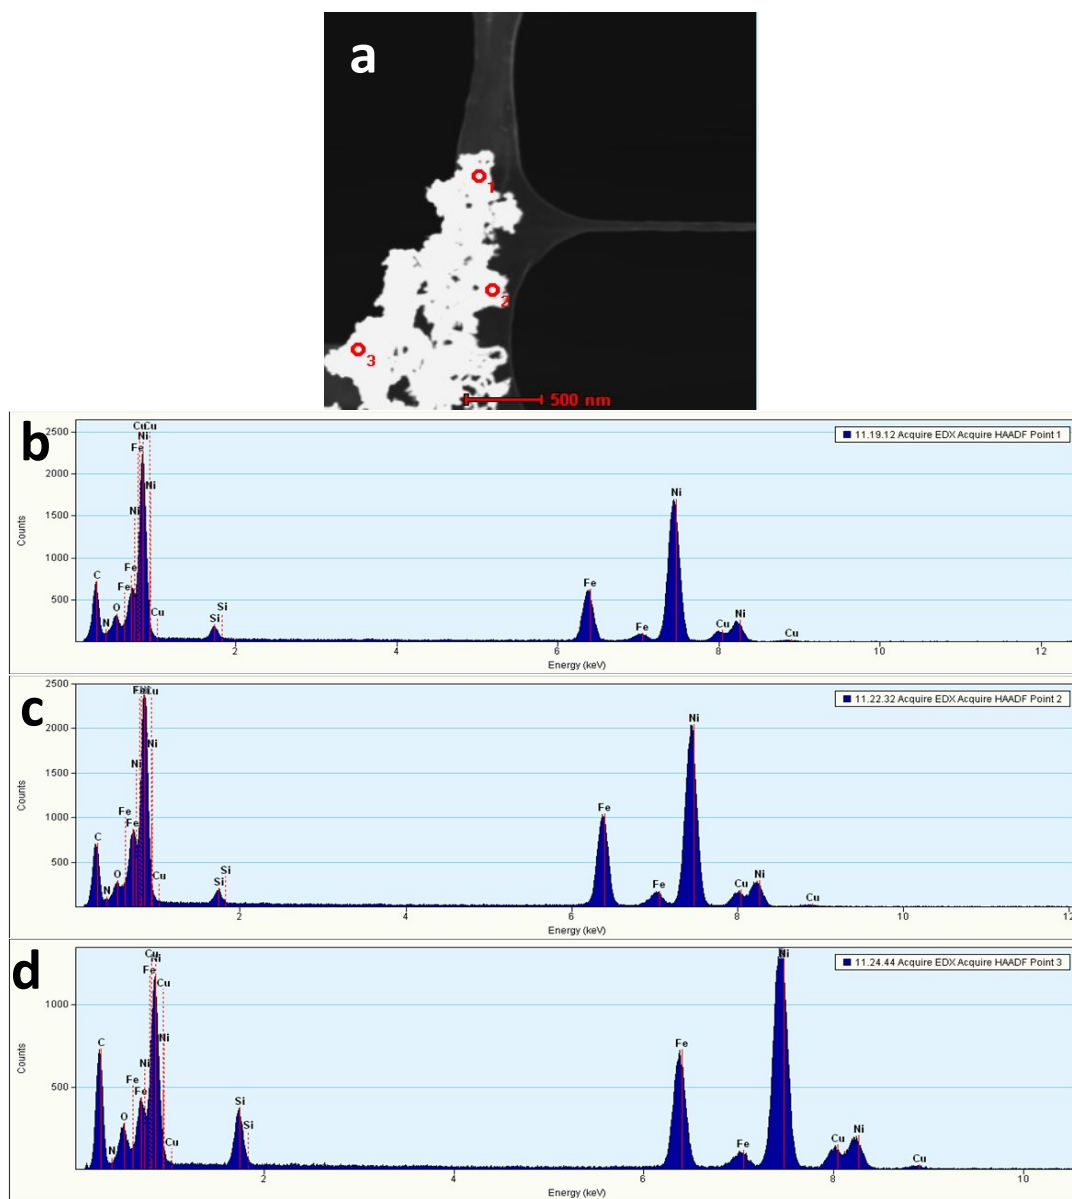

**Fig. S8** (a) HAADF-STEM image with the corresponding (b-d) EDS spectra of randomly chosen nanoparticles of  $\text{Ni}_3\text{Fe}_1$  catalyst.

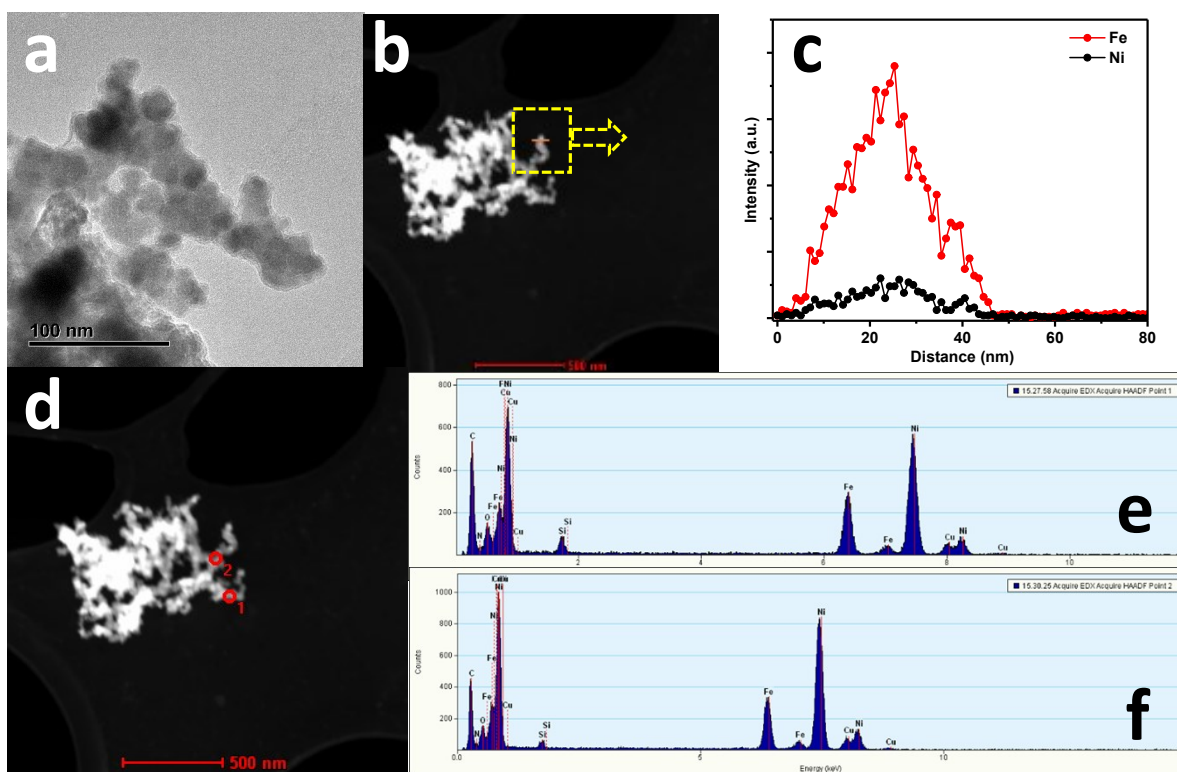

**Fig. S9** (a) TEM image. (b) HAADF-STEM image with corresponding (c) EDS line scanning profiles of Ni and Fe and (d-f) EDS spectra of randomly chosen nanoparticles of  $\text{Ni}_1\text{Fe}_3$  catalyst synthesized without PVP ligand.

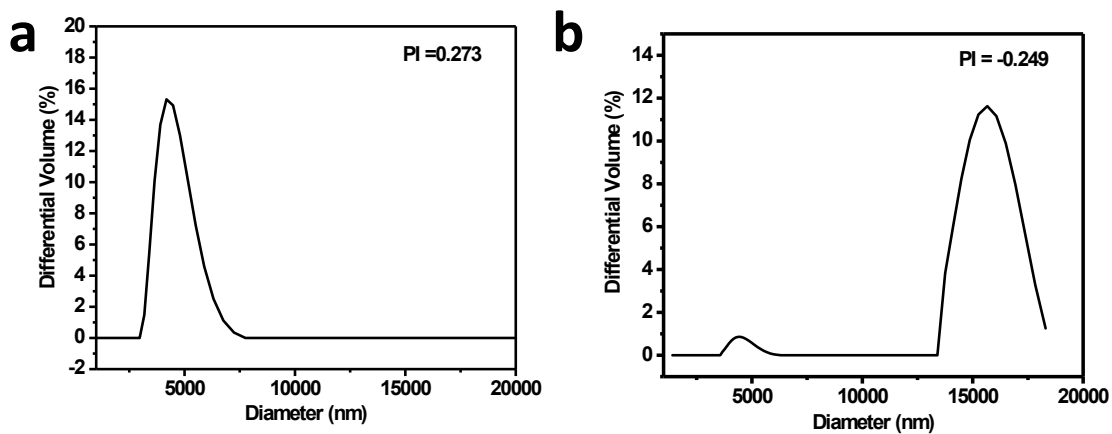

Fig. S10 DLS spectra of  $\text{Ni}_1\text{Fe}_3$  catalysts synthesized (a) with PVP and (b) without PVP.

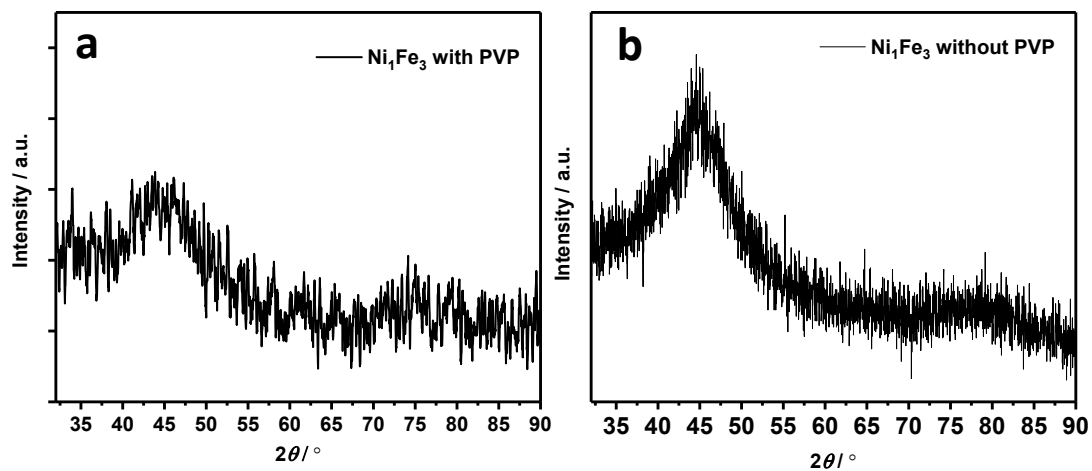

Fig. S11 P-XRD of  $\text{Ni}_1\text{Fe}_3$  catalyst synthesized (a) with and (b) without PVP.

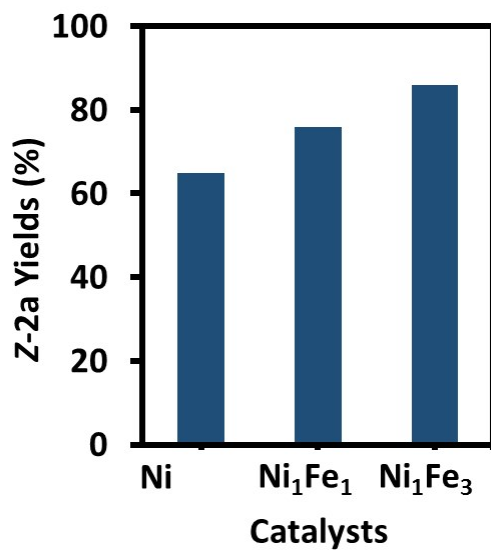

**Fig. S12** Catalytic hydrogenation of **1a** to **Z-2a**. Reaction conditions: **1a** (1.0 mmol), catalyst (10 mol%), *n*-butyl amine (0.55 mmol) under H<sub>2</sub> atmosphere at 40 °C for 4 h.

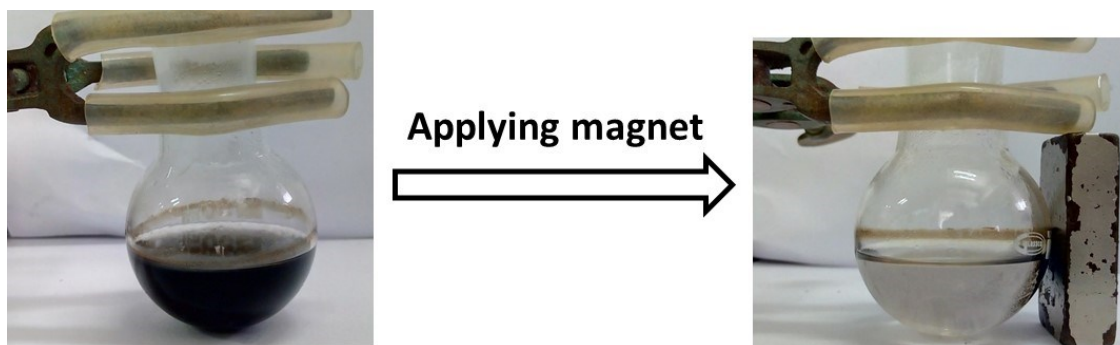

**Fig. S13** Magnetic separation of Ni<sub>1</sub>Fe<sub>3</sub> catalyst after the catalytic reaction.



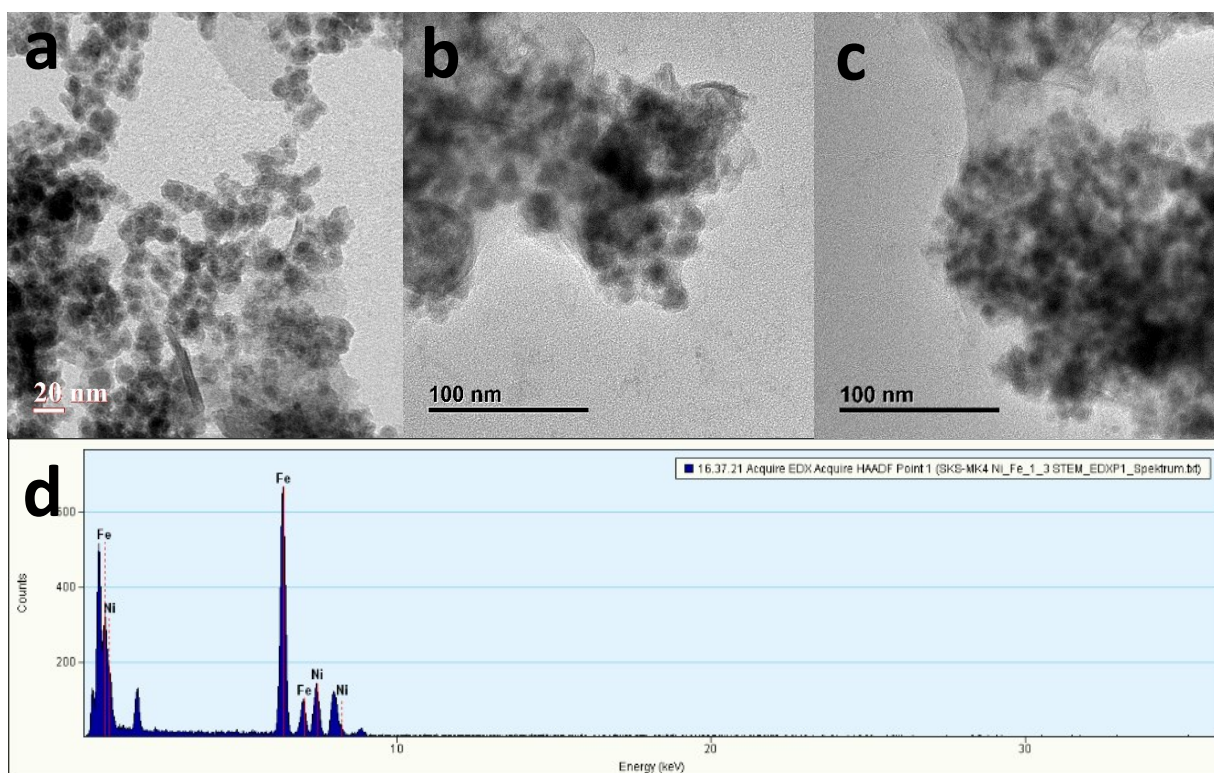

**Fig. S14** TEM images of (a) fresh and (b-c) spent  $\text{Ni}_1\text{Fe}_3$  nanoparticle catalyst. (d) EDS spectra of the spent  $\text{Ni}_1\text{Fe}_3$  nanoparticle catalyst.

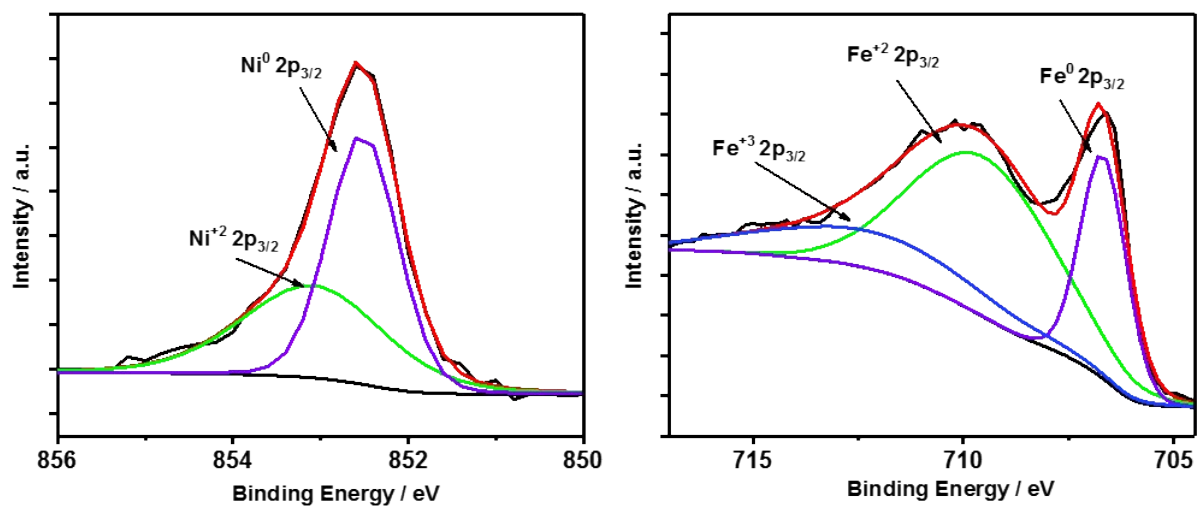

**Fig. S15** XPS spectra of  $\text{Ni}_1\text{Fe}_3$  spent catalysts after reaction.

### SI-6. CS<sub>2</sub> poisoning experiment

The aqueous-ethanolic solution (1:1 v/v, 20.0 mL) of Ni<sub>1</sub>Fe<sub>3</sub> catalyst (10 mol%) was added CS<sub>2</sub> (0.1, 0.25, 0.5 and 1 equiv. with reference to Ni metal in Ni<sub>1</sub>Fe<sub>3</sub>), and the reaction mixture was stirred at 40 °C for 1 h under H<sub>2</sub> balloon. Then diphenylacetylene (1.0 mmol) was added, and the reaction mixture was further stirred for 4 h in H<sub>2</sub> atmosphere (using a H<sub>2</sub> balloon) under the optimized reaction conditions. After 4 h of reaction, catalyst was magnetically separated from the reaction mixture. The reaction mixture was extracted with dichloromethane (3 × 5 mL), and the combined organic layer was dried over anhydrous Na<sub>2</sub>SO<sub>4</sub>, filtered, and concentrated under reduced pressure. Products were characterized by <sup>1</sup>H NMR.

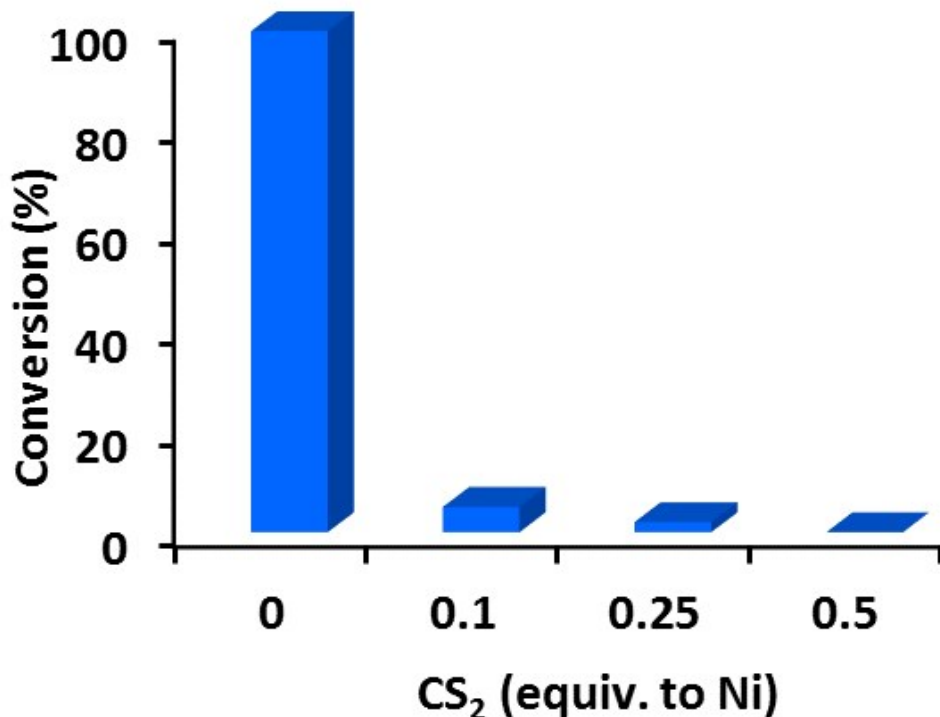

**Fig. S16** Heterogeneity test of Ni<sub>1</sub>Fe<sub>3</sub> catalyst using varying content of CS<sub>2</sub> poison.

## SI-7. Deuterium labeling experiments

**Experiment S1:** To the fresh catalyst (10 mol%), C<sub>2</sub>H<sub>5</sub>OH/D<sub>2</sub>O (1:1, 2 mL) diphenylacetylene (0.1 mmol) and *n*-butyl amine (0.055 mmol) was added. The reaction mixture was stirred at 40 °C for 4 h under H<sub>2</sub> atmosphere (using a H<sub>2</sub> balloon). After that, liquid aliquot was analyzed by GC-MS.

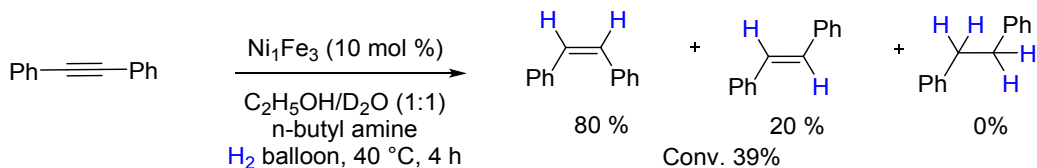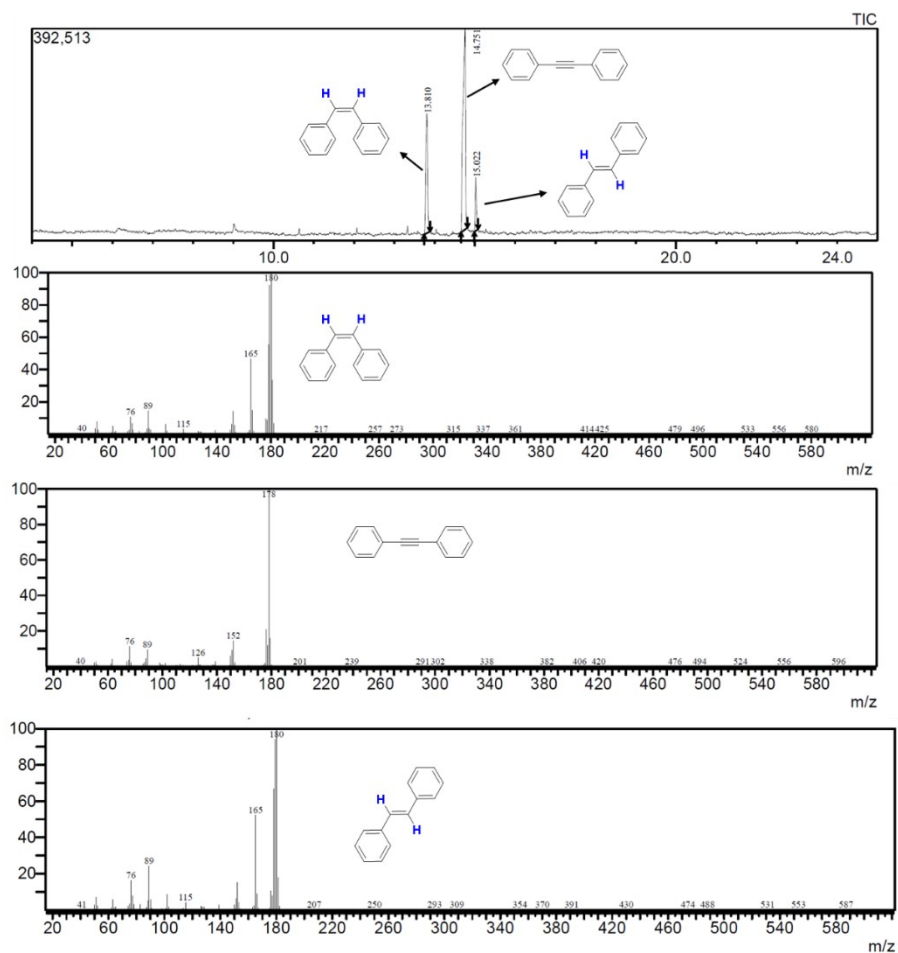

**Fig. S17** GC-MS spectra of Deuterium-labeling experiment for the semihydrogenation of diphenylacetylene in presence of C<sub>2</sub>H<sub>5</sub>OH/D<sub>2</sub>O.

**Experiment S2:** To the fresh Ni<sub>1</sub>Fe<sub>3</sub> catalyst (10 mol%), D<sub>2</sub>O (2 mL) and diphenylacetylene (0.1 mmol) was added, and the reaction mixture was stirred at 40 °C for 4 h under H<sub>2</sub> atmosphere (using a H<sub>2</sub> balloon). After 4h, the reaction aliquot was analyzed by GC-MS.

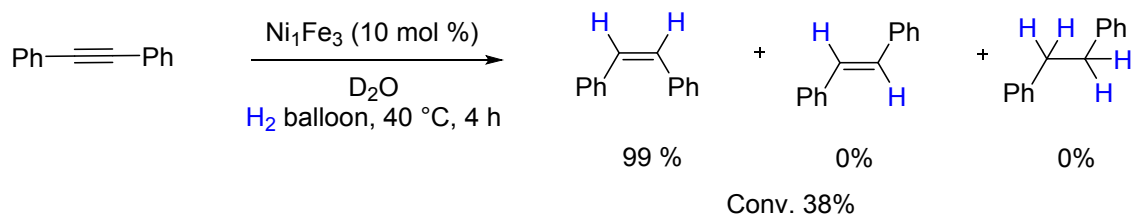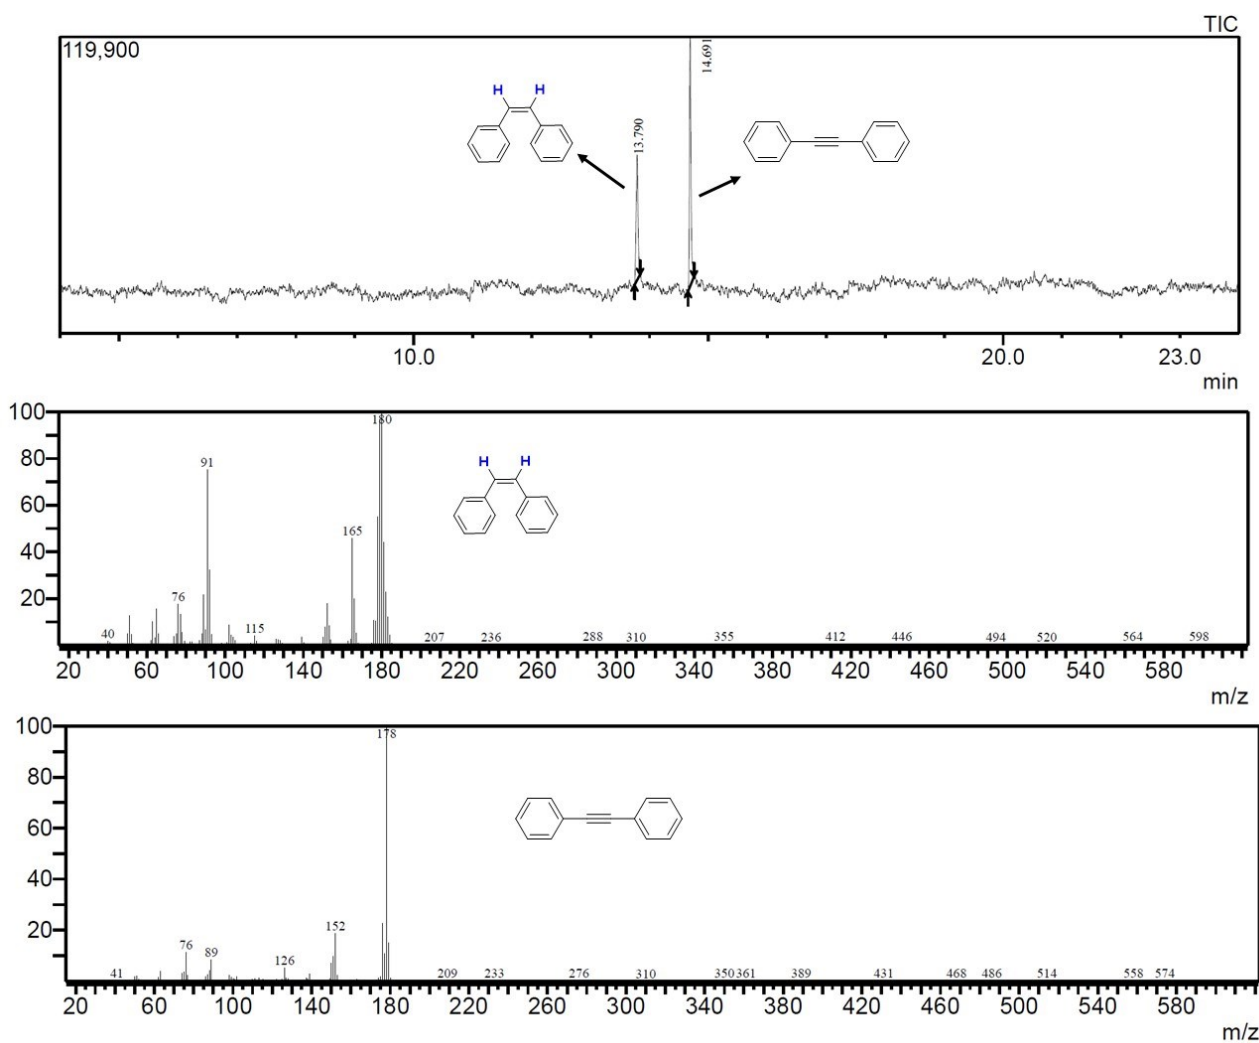

**Fig. S18** GC-MS spectra of deuterium-labeling experiment for the semihydrogenation of diphenyl acetylene in presence of D<sub>2</sub>O only.

**Experiment S3:** To the fresh catalyst (10 mol%), C<sub>2</sub>H<sub>5</sub>OH/H<sub>2</sub>O (1:1, 20 mL) diphenylacetylene (1.0 mmol) and *n*-butyl amine (0.55 mmol) was added. The reaction mixture was stirred at 40 °C for 4 h under D<sub>2</sub> atmosphere (using a D<sub>2</sub> balloon). After that, liquid aliquot was analysed by GC-MS and NMR.

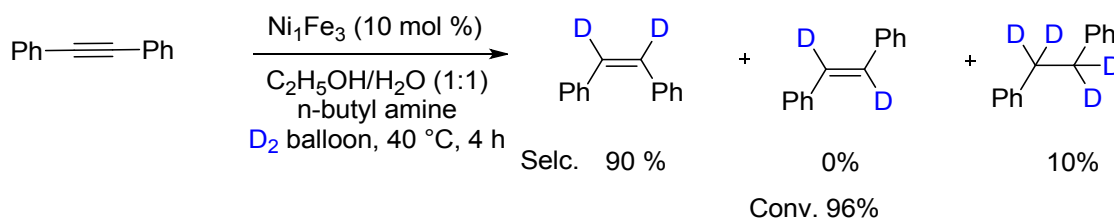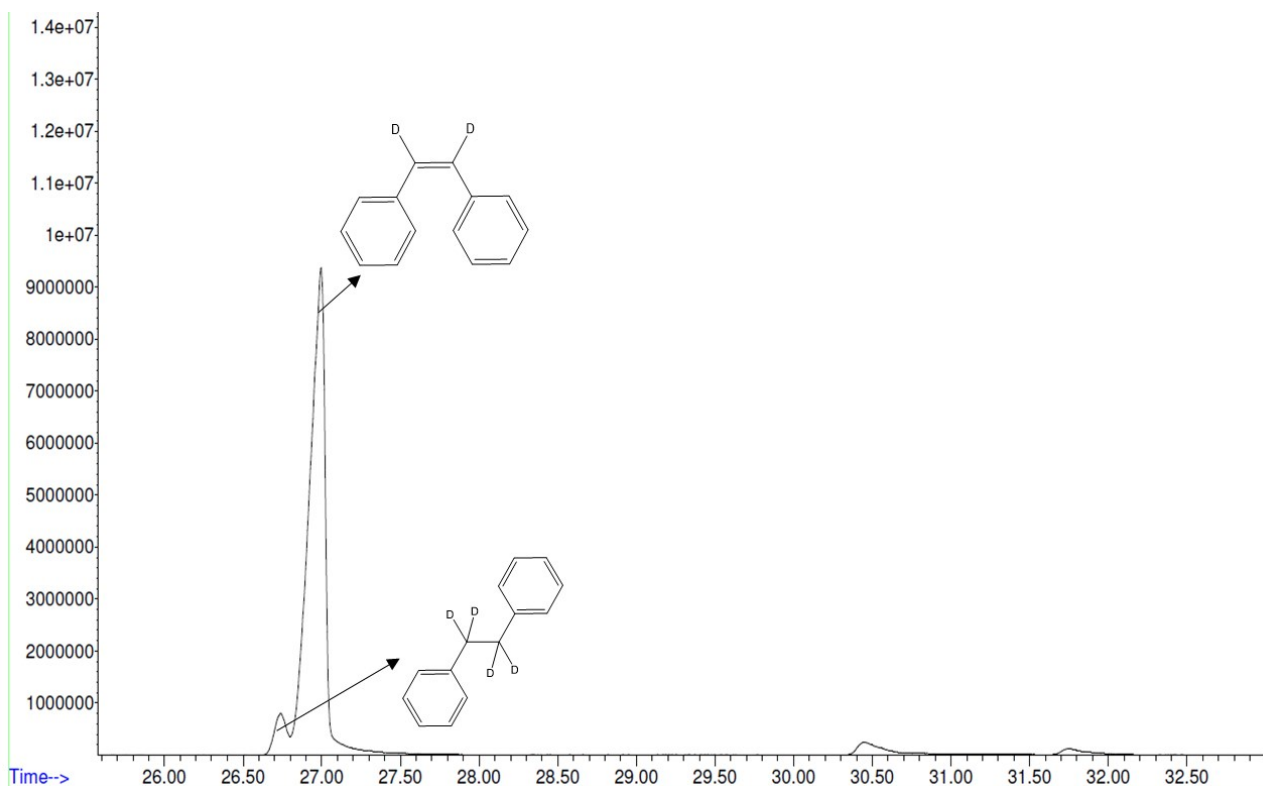

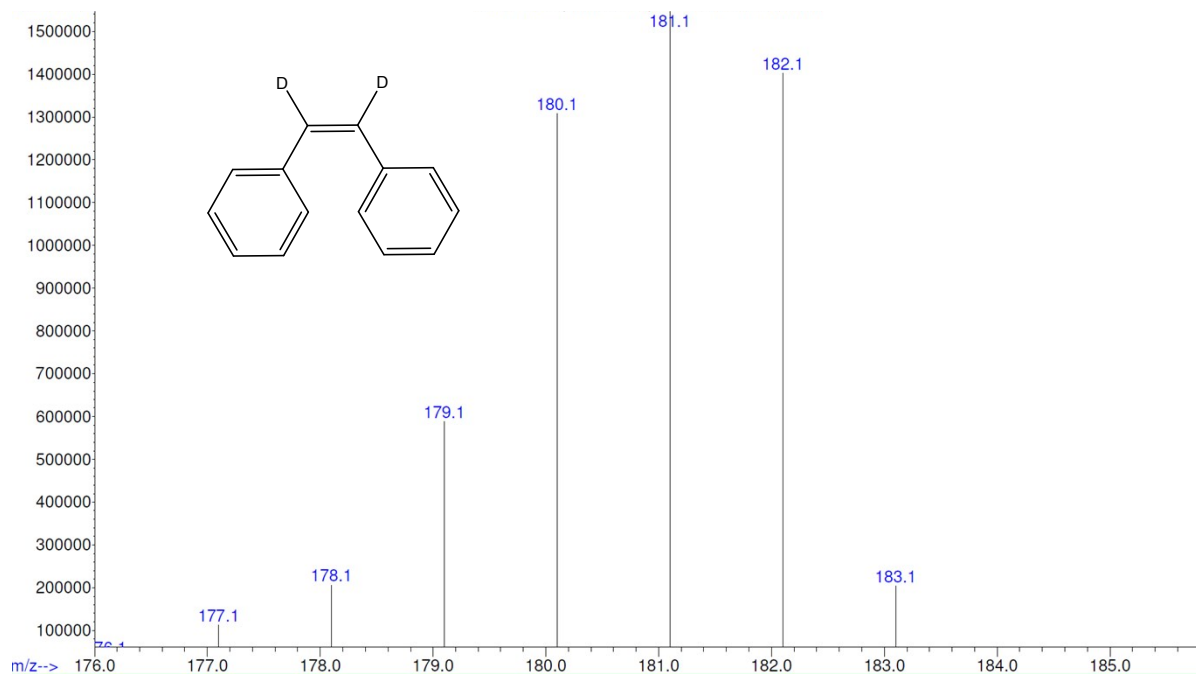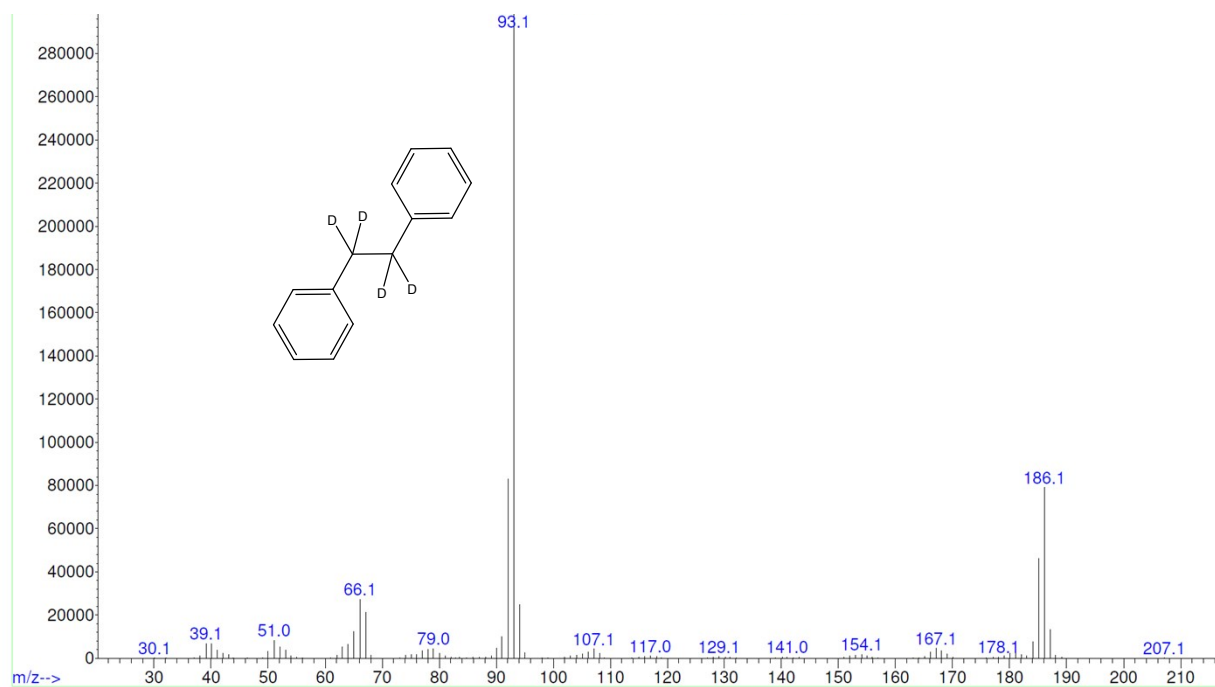

**Fig. S19** GC-MS spectra of Deuterium-labeling experiment for the semihydrogenation of diphenylacetylene in the presence of  $D_2$  gas.

# <sup>1</sup>H NMR

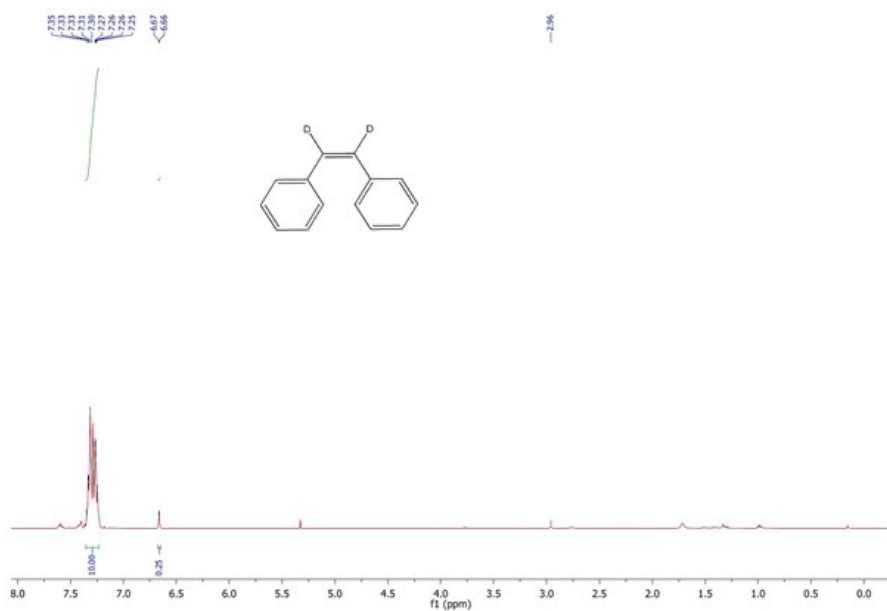

# <sup>2</sup>D NMR

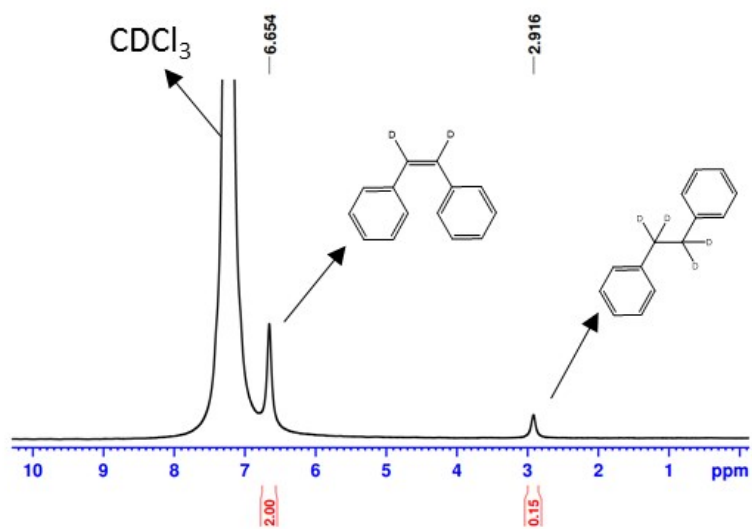

**Fig. S20** <sup>1</sup>H NMR and <sup>2</sup>D NMR spectra of Deuterium-labeling experiment for the semihydrogenation of diphenylacetylene in the presence of D<sub>2</sub> gas.

### SI-8. H<sub>2</sub>-TPD experiment:

**Experimental condition:** For H<sub>2</sub>-TPD measurements, 50 mg of catalyst was treated in H<sub>2</sub>/Ar (1:9) flow (50 cc/min) at 300 °C for 4 h then cooled to ambient temperature at the same flow of gas. Then after, Ar gas flow (50 cc/min) was introduced and the catalyst was purged for 30 min to remove physisorbed H<sub>2</sub>. After the stabilization of the base-line, TPD of desorbed H<sub>2</sub> was recorded up to 700 °C at a temperature ramp of 10 °C/min.

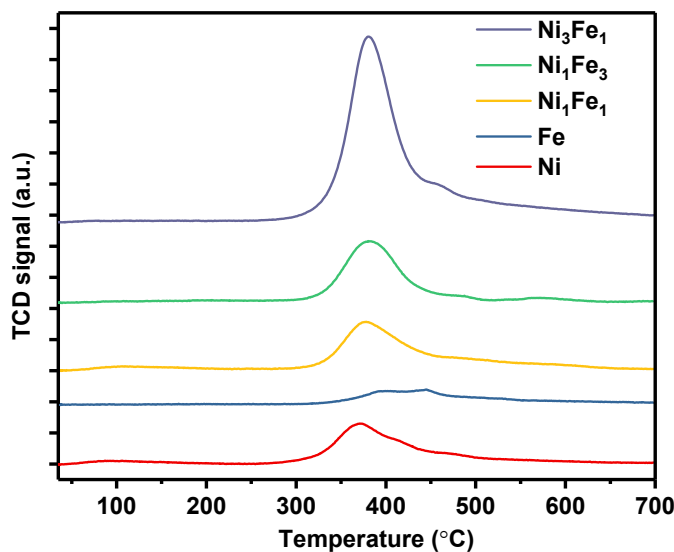

**Fig. S21** H<sub>2</sub>-TPD profile for the bimetallic Ni-Fe catalysts along with monometallic (Ni and Fe) catalysts.



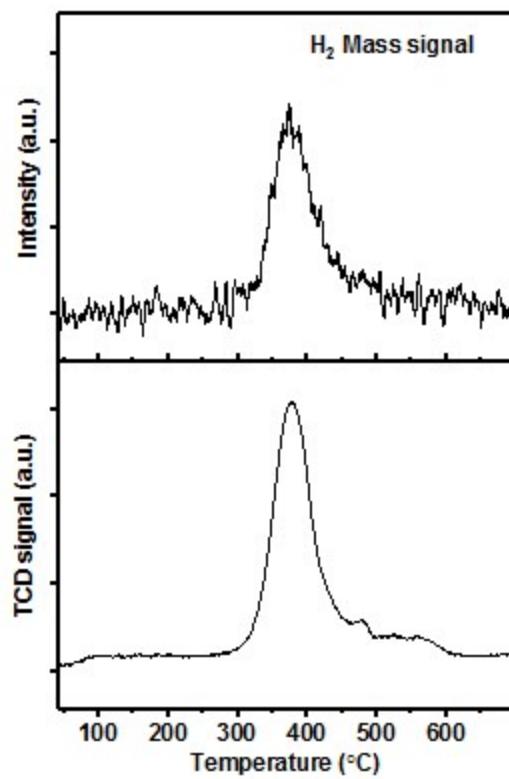

**Fig. S22** H<sub>2</sub>-TPD of Ni<sub>1</sub>Fe<sub>3</sub> catalyst and their corresponding H<sub>2</sub> mass signal.

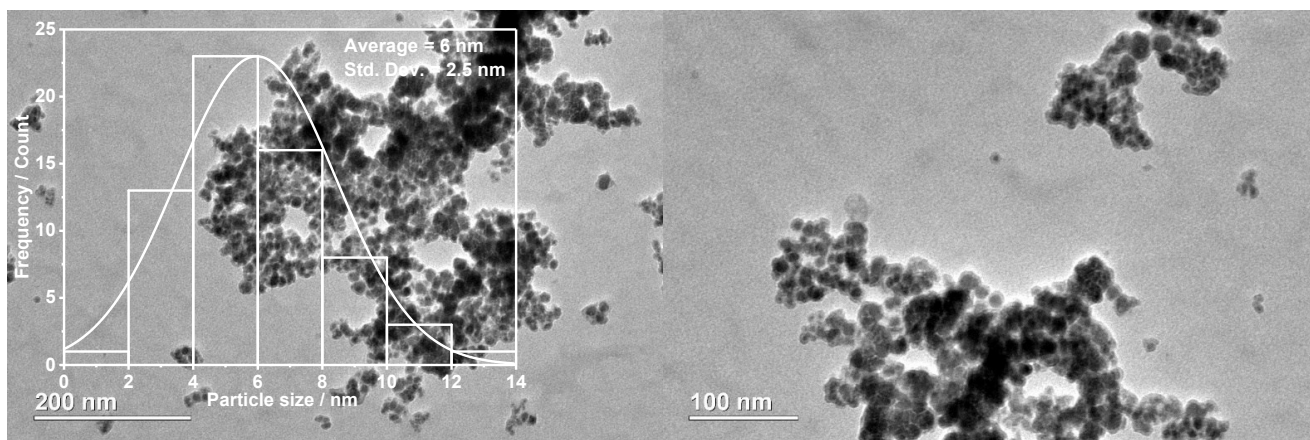

**Fig. S23** TEM image and particle size distribution curve of the  $\text{Ni}_1\text{Fe}_3$  catalyst synthesized in bulk scale.

**SI-10. XPS survey scan of different catalysts**

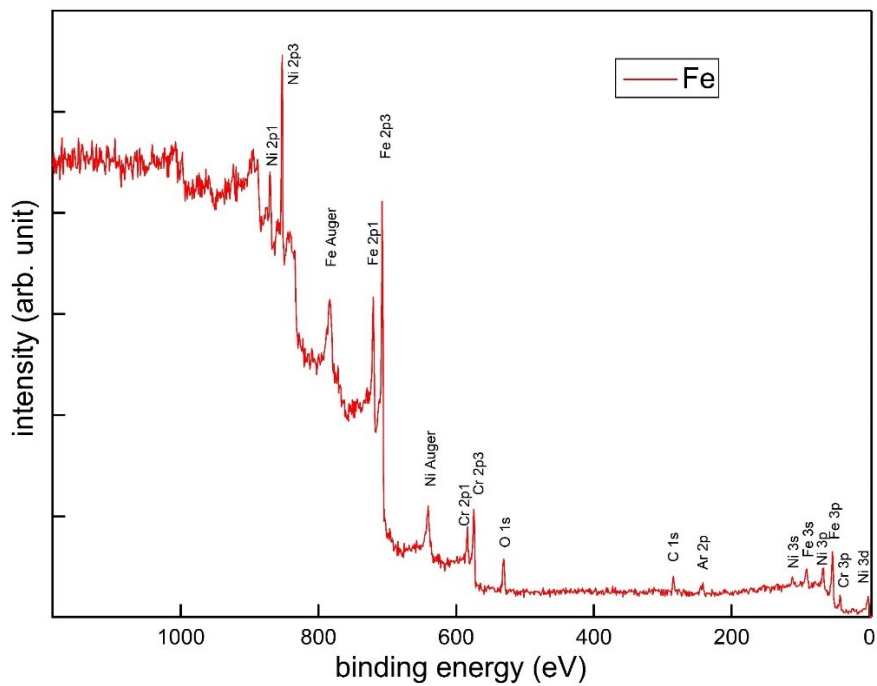

**Fig. S24** XPS survey scan of freshly prepared Fe catalysts.

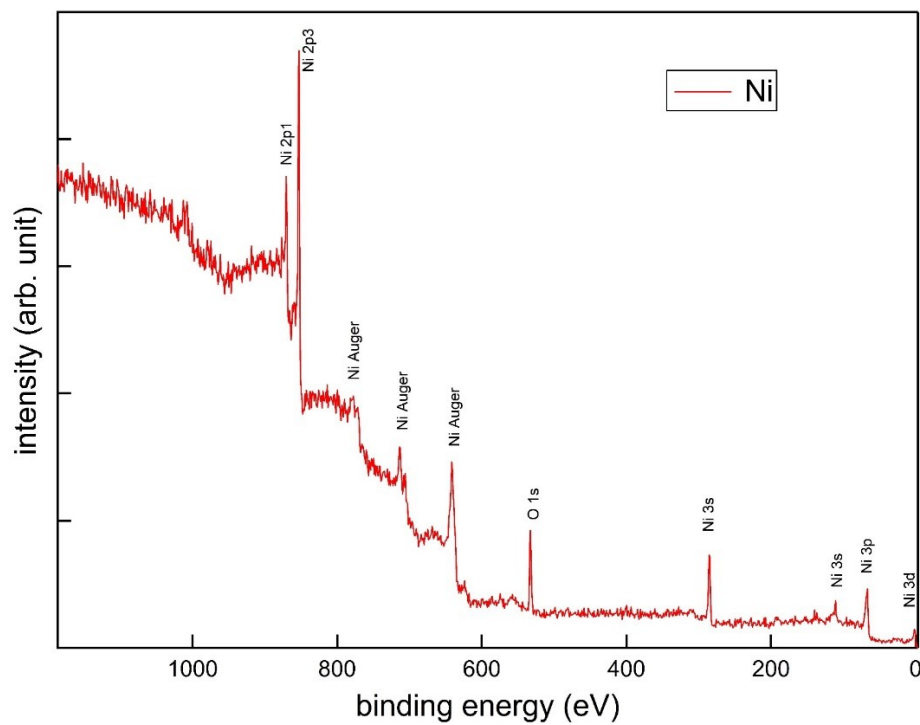

**Fig. S25** XPS survey scan of freshly prepared Ni catalysts.

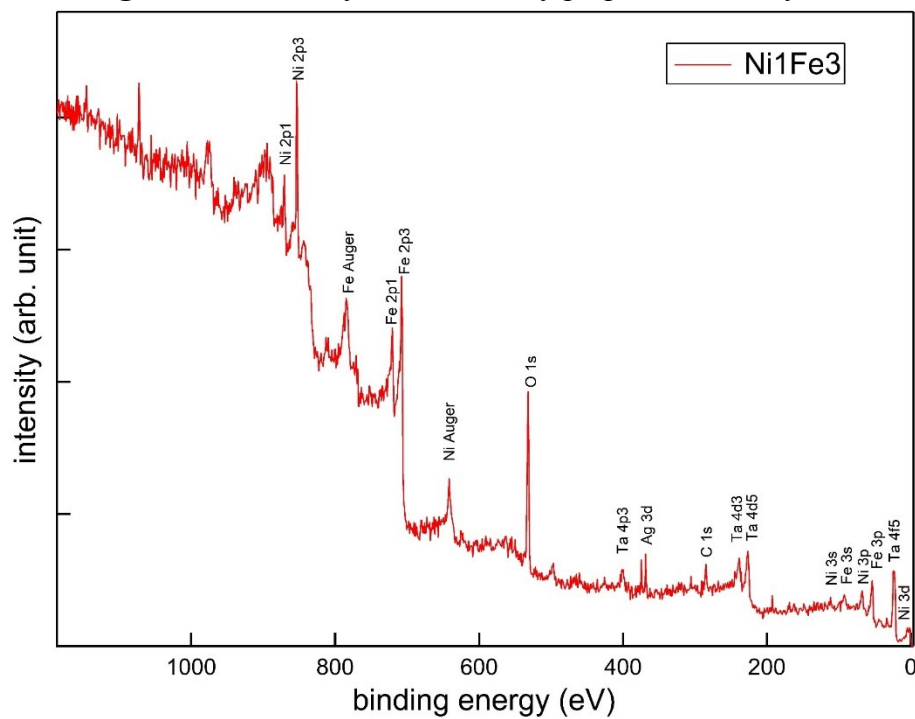

**Fig. S26** XPS survey scan of freshly prepared Ni<sub>1</sub>Fe<sub>3</sub> catalysts.

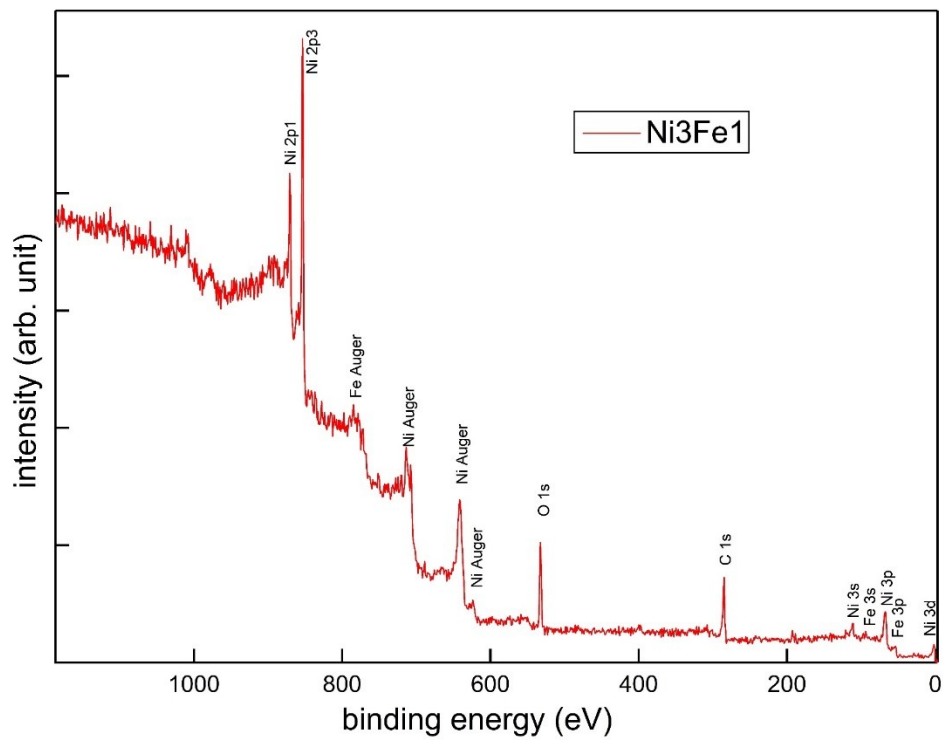

**Fig. S27** XPS survey scan of freshly prepared Ni<sub>3</sub>Fe<sub>1</sub> catalysts.

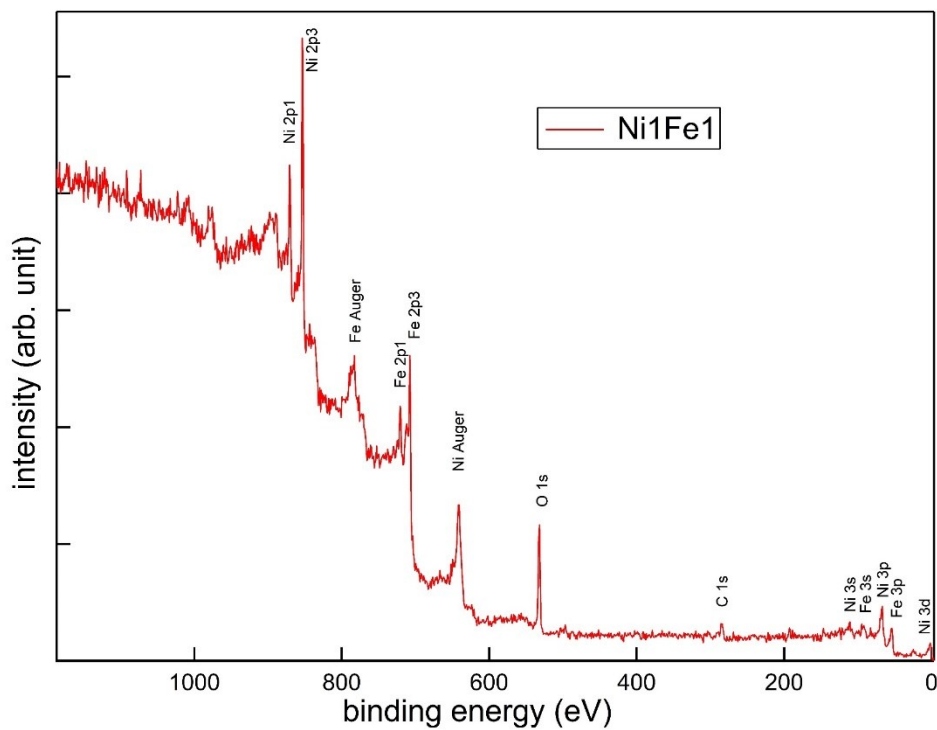

**Fig. S28** XPS survey scan of freshly prepared Ni<sub>1</sub>Fe<sub>1</sub> catalysts.

**SI-10. Hydrogenation of terminal alkynes over Ni<sub>1</sub>Fe<sub>3</sub> catalyst**

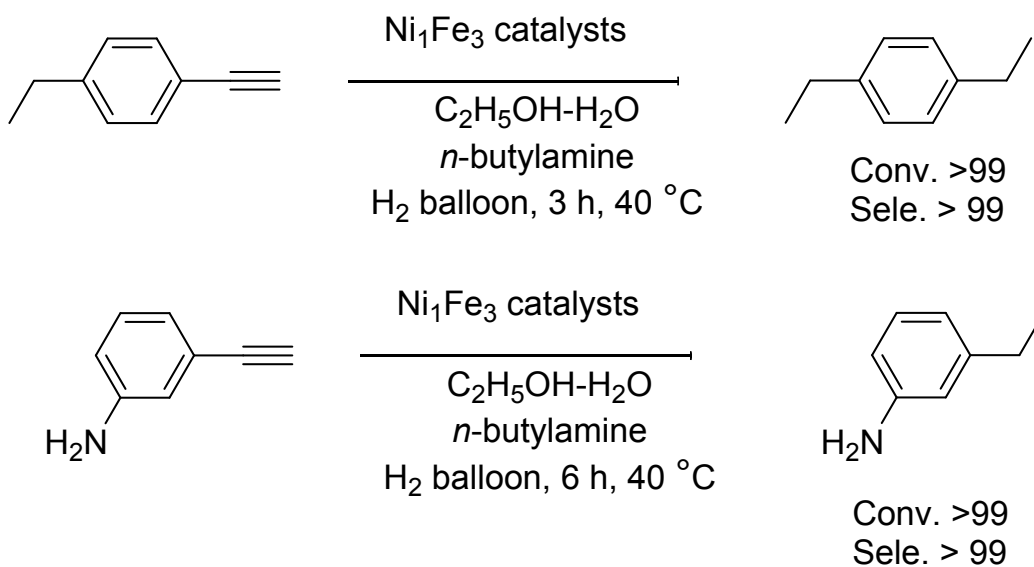

**Scheme S1** Hydrogenation of terminal alkynes over Ni<sub>1</sub>Fe<sub>3</sub> catalyst. Reaction condition: terminal alkyne (1.0 mmol), catalyst (10 mol%), H<sub>2</sub> balloon, *n*-butyl amine (0.55 mmol), water-ethanol (1:1 v/v, 20.0 mL).

## SI-11. ICP experiment under optimized reaction condition

**Table S1** ICP data of different synthesized catalysts.

| S. No. | Catalysts                       | Ni/Fe atomic ratio       |
|--------|---------------------------------|--------------------------|
| 1      | Ni <sub>1</sub> Fe <sub>3</sub> | 1/2.7 (1/3) <sup>a</sup> |
| 2      | Ni <sub>1</sub> Fe <sub>1</sub> | 1/1                      |
| 3      | Ni <sub>3</sub> Fe <sub>1</sub> | 3/1                      |

<sup>a</sup>For spent Ni<sub>1</sub>Fe<sub>3</sub> catalyst recovered after the catalytic semihydrogenation reaction of diphenylacetylene (**1a**) under the optimized reaction condition.

## SI-12. Screening of additives and hydrogen source for the semihydrogenation of diphenylacetylene

**Table S2** Screening of additives and hydrogen source for the semihydrogenation of diphenylacetylene<sup>a</sup>

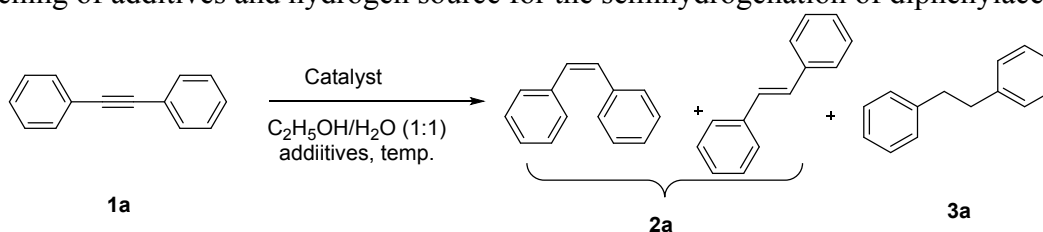

| Entry | Catalysts                                        | Temp. (°C) | Time (h) | Hydrogen source                                 | Additives (mmol)              | Conv. (%) <sup>b</sup>                                        | Sele. (%) <sup>b</sup> (2a/3a)                                         | Sele. (%) <sup>b</sup> (Z/E)                                            |
|-------|--------------------------------------------------|------------|----------|-------------------------------------------------|-------------------------------|---------------------------------------------------------------|------------------------------------------------------------------------|-------------------------------------------------------------------------|
| 1.    | Ni <sub>1</sub> Fe <sub>3</sub>                  | 40         | 6        | H <sub>2</sub>                                  | <i>n</i> -propyl amine (0.55) | 99                                                            | 54/46                                                                  | 89/11                                                                   |
| 2.    | Ni <sub>1</sub> Fe <sub>3</sub>                  | 50         | 5        | H <sub>2</sub>                                  | <i>isopropyl</i> amine (0.55) | 96                                                            | 72/28                                                                  | 92/8                                                                    |
| 3.    | Ni <sub>1</sub> Fe <sub>3</sub>                  | 40         | 6        | H <sub>2</sub>                                  | <i>n</i> -propyl amine (0.65) | 70                                                            | 93/7                                                                   | 96/4                                                                    |
| 4.    | Ni <sub>1</sub> Fe <sub>3</sub>                  | 40         | 5        | H <sub>2</sub>                                  | <i>n</i> -propyl amine (0.45) | 99                                                            | 51/49                                                                  | 78/22                                                                   |
| 5.    | Ni <sub>1</sub> Fe <sub>3</sub>                  | 40         | 4        | H <sub>2</sub>                                  | <i>n</i> -butyl amine (0.55)  | 99(94) <sup>c</sup><br>(77) <sup>d</sup><br>(23) <sup>e</sup> | 91/9(89/11) <sup>c</sup><br>(95/5) <sup>d</sup><br>(97/3) <sup>e</sup> | 96/4 (94/6) <sup>c</sup><br>(91/9) <sup>d</sup><br>(79/21) <sup>e</sup> |
| 6.    | Ni <sub>1</sub> Fe <sub>3</sub><br>(without PVP) | 40         | 5        | H <sub>2</sub>                                  | No additive                   | 47                                                            | 99/-                                                                   | 92/8                                                                    |
| 7.    | Ni <sub>1</sub> Fe <sub>3</sub><br>(without PVP) | 40         | 5        | H <sub>2</sub>                                  | <i>n</i> -butyl amine (0.55)  | 26                                                            | 99/-                                                                   | 90/10                                                                   |
| 8.    | Ni <sub>1</sub> Fe <sub>3</sub>                  | 40         | 4        | H <sub>2</sub>                                  | <i>n</i> -butyl amine (0.55)  | 96                                                            | 85/15                                                                  | 92/8 <sup>f</sup>                                                       |
| 9.    | Ni <sub>1</sub> Fe <sub>3</sub>                  | 40         | 4        | H <sub>2</sub>                                  | <i>n</i> -butyl amine (0.45)  | 99                                                            | 49/51                                                                  | 86/14                                                                   |
| 10.   | Ni <sub>1</sub> Fe <sub>3</sub>                  | 40         | 4        | H <sub>2</sub>                                  | <i>n</i> -butyl amine (0.65)  | 90                                                            | 92/8                                                                   | 93/7                                                                    |
| 11.   | Ni <sub>1</sub> Fe <sub>3</sub>                  | 40         | 5        | H <sub>2</sub>                                  | <i>n</i> -butyl amine (0.55)  | 99                                                            | 80/20                                                                  | 97/3                                                                    |
| 12.   | Ni <sub>1</sub> Fe <sub>3</sub>                  | 40         | 2        | H <sub>2</sub>                                  | <i>n</i> -butyl amine (0.55)  | 47                                                            | 93/7                                                                   | 95/5                                                                    |
| 13.   | Ni/Fe <sub>3</sub> O <sub>4</sub>                | 50         | 5        | H <sub>2</sub>                                  | <i>n</i> -butyl amine (0.55)  | 80                                                            | 61/39                                                                  | 90/10                                                                   |
| 14.   | Ni <sub>1</sub> Fe <sub>3</sub>                  | 40         | 4        | NaBH <sub>4</sub>                               | <i>n</i> -butyl amine (0.55)  | 23                                                            | 91/9                                                                   | 81/19                                                                   |
| 15.   | Ni <sub>1</sub> Fe <sub>3</sub>                  | 50         | 6        | N <sub>2</sub> H <sub>4</sub> ·H <sub>2</sub> O | --                            | 70                                                            | 95/5                                                                   | 96/4                                                                    |

<sup>a</sup>Reaction conditions: Alkyne (1.0 mmol), catalyst (10 mol%), hydrogen source (H<sub>2</sub> balloon, NaBH<sub>4</sub> (1.0 mmol) or N<sub>2</sub>H<sub>4</sub>·H<sub>2</sub>O (2.0 mmol)). <sup>b</sup>Conversion of the substrate and selectivity of (*Z*) *cis*-alkene, (*E*) *trans*-alkene, alkane

was determined by  $^1\text{H}$  NMR. <sup>c</sup>Repeat experiment. <sup>d</sup>2<sup>nd</sup> and <sup>e</sup>3<sup>rd</sup> cycle of  $\text{Ni}_1\text{Fe}_3$  catalyst after fresh addition of diphenylacetylene (1.0 mmol) and *n*-butyl amine (0.55) for 4 h. <sup>f</sup>catalytic activity with catalysts prepared in bulk (10 times higher than the small scale synthesis)

### SI-13. Spectral data of semihydrogenated products

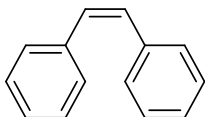

**(Z)-1,2-diphenylethene:**  $^1\text{H}$  NMR (400 MHz,  $\text{CDCl}_3$ )  $\delta$  = 7.25 - 7.17 (m, 10H), 6.59 (s, 2H).

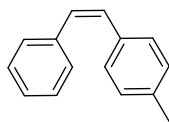

**(Z)-1-methyl-4-styrylbenzene:**  $^1\text{H}$  NMR (400 MHz,  $\text{CDCl}_3$ )  $\delta$  (ppm) = 7.27 - 7.20 (m, 5H), 7.14 (d, 2H,  $J$  = 8.0 Hz), 7.02 (d, 2H,  $J$  = 8.0 Hz), 6.55 (s, 2H), 2.31 (s, 3H);  $^{13}\text{C}$  NMR (100 MHz,  $\text{CDCl}_3$ ):  $\delta$  (ppm) = 137.67, 136.98, 134.45, 130.38, 129.73, 129.02, 128.98, 128.48, 128.35, 127.13, 21.38.

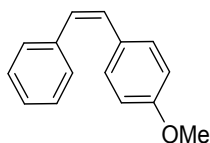

**(Z)-1-methoxy-4-styrylbenzene:**  $^1\text{H}$  NMR (400 MHz,  $\text{CDCl}_3$ )  $\delta$  (ppm) = 7.28-7.17 (m, 7H), 6.75 (d, 2H,  $J$  = 8.0 Hz), 6.52 (s, 2H), 3.78 (s, 3H).



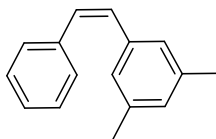

**(Z)-1,3-dimethyl-5-styrylbenzene:**  $^1\text{H NMR}$  (400 MHz,  $\text{CDCl}_3$ )  $\delta$  (ppm) = 7.27 - 7.17 (m, 5H), 6.87-6.83 (m, 3H) 6.54 (s, 2H), 2.21 (s, 6H);  $^{13}\text{C NMR}$  (100 MHz,  $\text{CDCl}_3$ ):  $\delta$  (ppm) = 137.72, 137.51, 137.27, 130.58, 130.0, 129.0, 128.89, 128.21, 127.13, 126.73, 21.0.

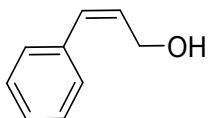

**(Z)-3-phenylprop-2-en-1-ol:**  $^1\text{H NMR}$  (400 MHz,  $\text{CDCl}_3$ )  $\delta$  (ppm) = 7.36-7.31 (m, 2H), 7.28 - 7.24 (m, 1H), 7.21 (d, 2H,  $J = 8.0$  Hz), 6.58 (d, 1H,  $J = 12.0$  Hz), 5.90 - 5.84 (m, 1H), 4.44 (d, 2H,  $J = 8.0$  Hz), 1.72 (s, 1H);  $^{13}\text{C NMR}$  (100 MHz,  $\text{CDCl}_3$ ):  $\delta$  (ppm) = 136.60, 131.37, 130.79, 128.81, 128.29, 127.24, 59.58.

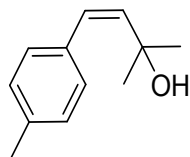

**(Z)-2-methyl-4-(p-tolyl)but-3-en-2-ol:**  $^1\text{H NMR}$  (400 MHz,  $\text{CDCl}_3$ )  $\delta$  (ppm) = 7.38 (d, 2H,  $J = 8.0$  Hz), 7.23 (d, 2H,  $J = 8.0$  Hz), 6.55 (d, 1H,  $J = 12.0$  Hz), 6.85 (d, 1H,  $J = 12.0$  Hz), 2.46 (s, 3H), 2.07 (s, 1H), 1.49 (s, 6H).

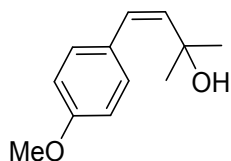

**(Z)-4-(4-methoxyphenyl)-2-methylbut-3-en-2-ol:**  $^1\text{H}$  NMR (400 MHz,  $\text{CDCl}_3$ )  $\delta$  (ppm) = 7.33 (d, 2H,  $J = 8.0$  Hz), 6.85 (d, 2H,  $J = 8.0$  Hz), 6.39 (d, 1H,  $J = 12.0$  Hz), 5.69 (d, 1H,  $J = 12.0$  Hz), 3.80 (s, 3H), 1.87 (s, 1H), 1.37 (s, 6H).

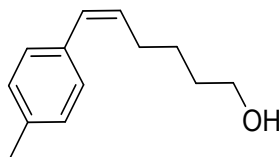

**(Z)-6-(p-tolyl)hex-5-en-1-ol:**  $^1\text{H}$  NMR (400 MHz,  $\text{CDCl}_3$ )  $\delta$  (ppm) = 7.18 - 7.12 (m, 4H), 6.39 (d, 1H  $J = 12.0$  Hz), 5.62 - 5.59 (m, 1H), 3.63 (t, 2H,  $J = 8.0$  Hz), 2.39 - 2.31 (m, 4H), 1.62-1.48 (m, 6H);  $^{13}\text{C}$  NMR (100 MHz,  $\text{CDCl}_3$ ):  $\delta$  (ppm) = 136.23, 134.85, 131.98, 129.03, 128.90, 128.72, 62.72, 32.29, 28.36, 26.16, 21.20.

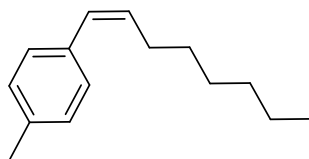

**(Z)-1-methyl-4-(oct-1-en-1-yl)benzene:**  $^1\text{H}$  NMR (400 MHz,  $\text{CDCl}_3$ )  $\delta$  = 7.19 - 7.13 (m, 4H), 6.37 (d, 1H  $J = 12.0$  Hz), 5.65 - 5.58 (m, 1H), 2.34-2.29 (m, 5H), 1.46 - 1.40 (m, 2H), 1.36 - 1.26 (m, 6H), 0.88 (t, 3H  $J = 12$  Hz).

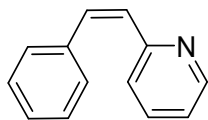

**(Z)-2-styrylpyridine:**  $^1\text{H}$  NMR (400 MHz,  $\text{CDCl}_3$ )  $\delta$  (ppm) = 8.61 (d, 1H,  $J = 4.0$  Hz), 7.69-7.07 (m, 8H), 6.83 (d, 1H,  $J = 12.0$  Hz), 6.70 (d, 1H,  $J = 12.0$  Hz). {*J. Am. Chem. Soc.* **132**, 5018–5020 (2010)}

### SI-14. GC-MS spectra for semihydrogenated products

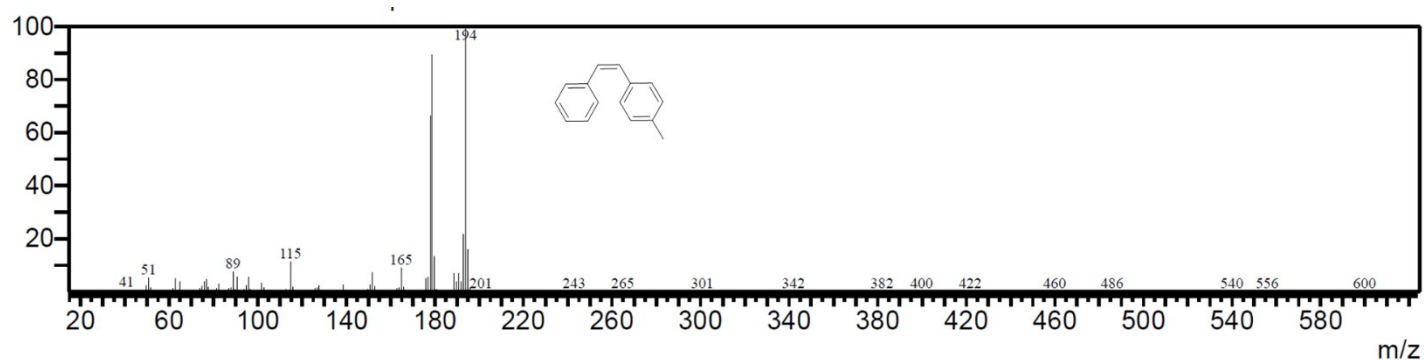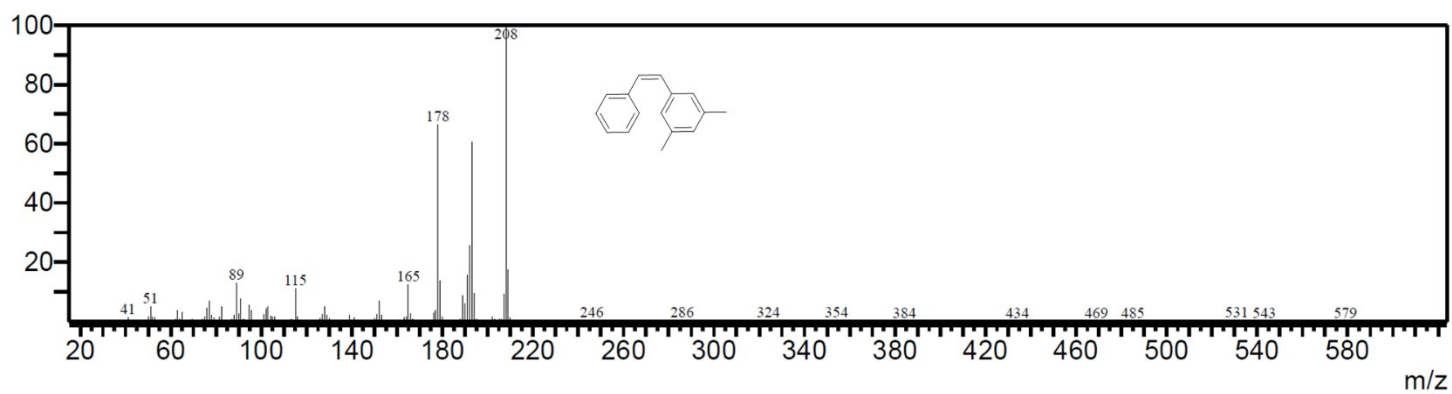

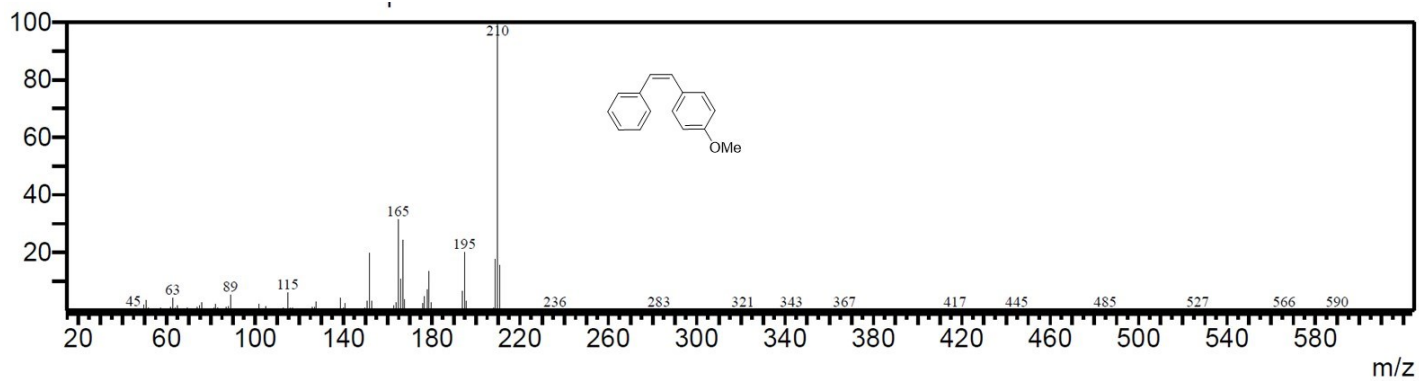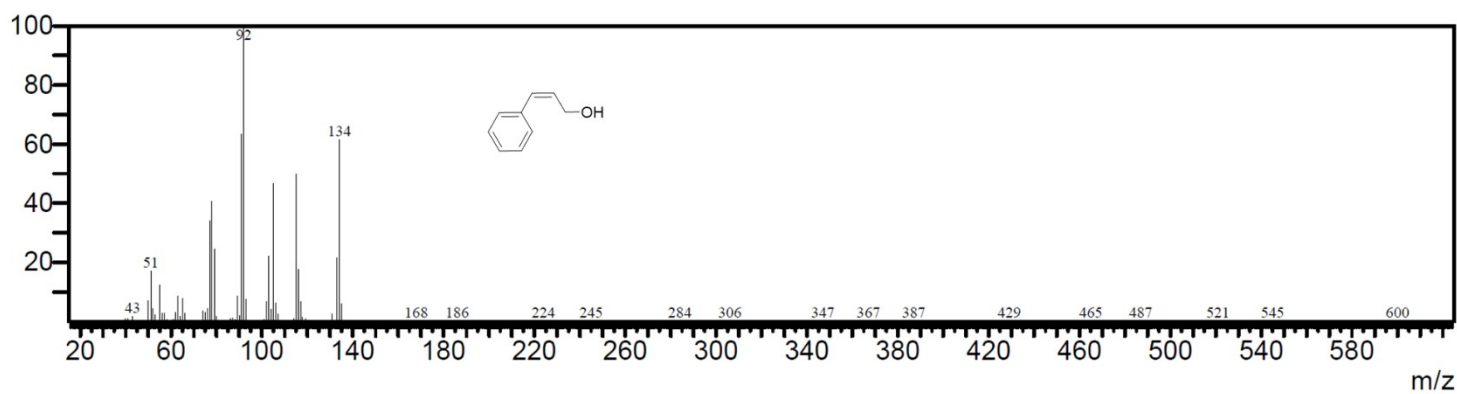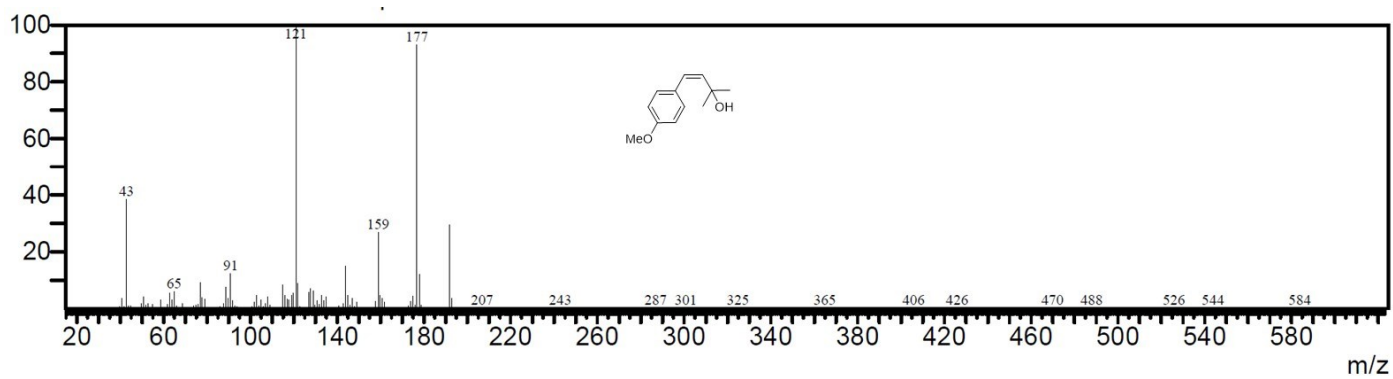

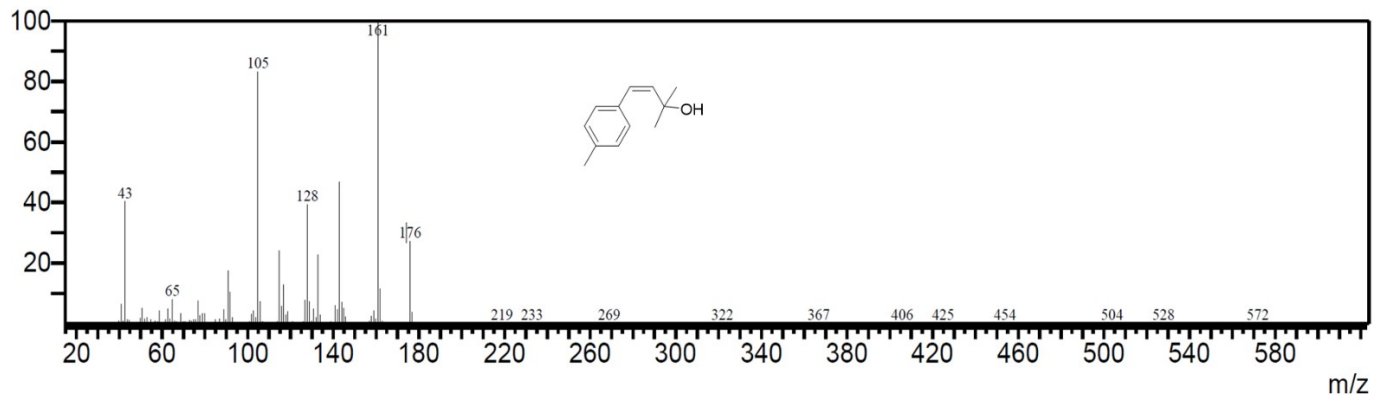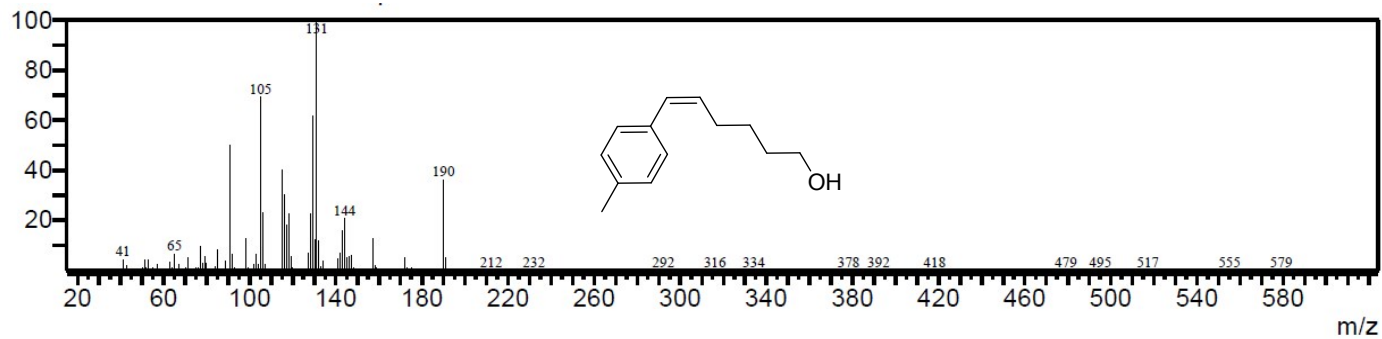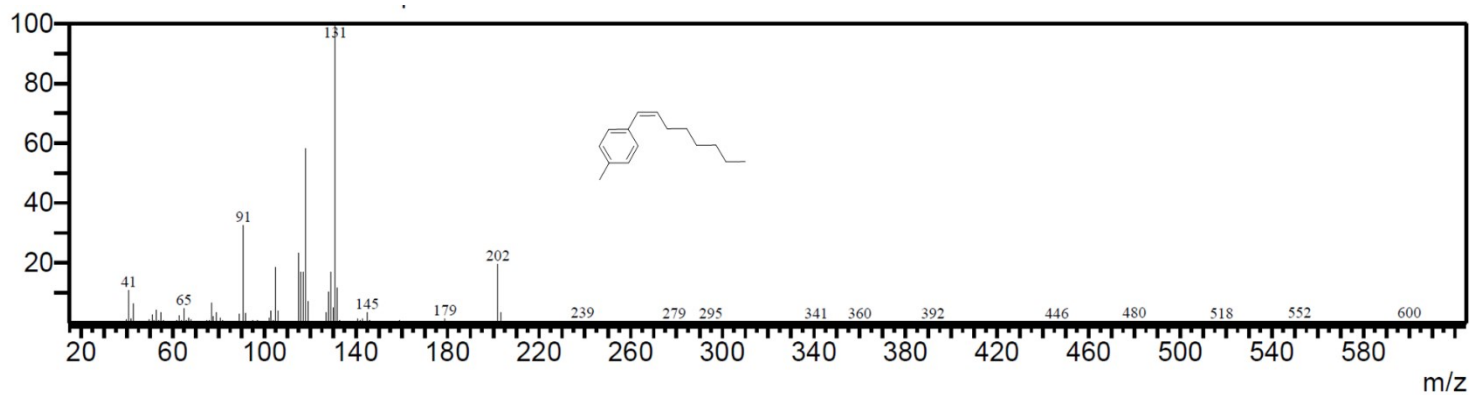

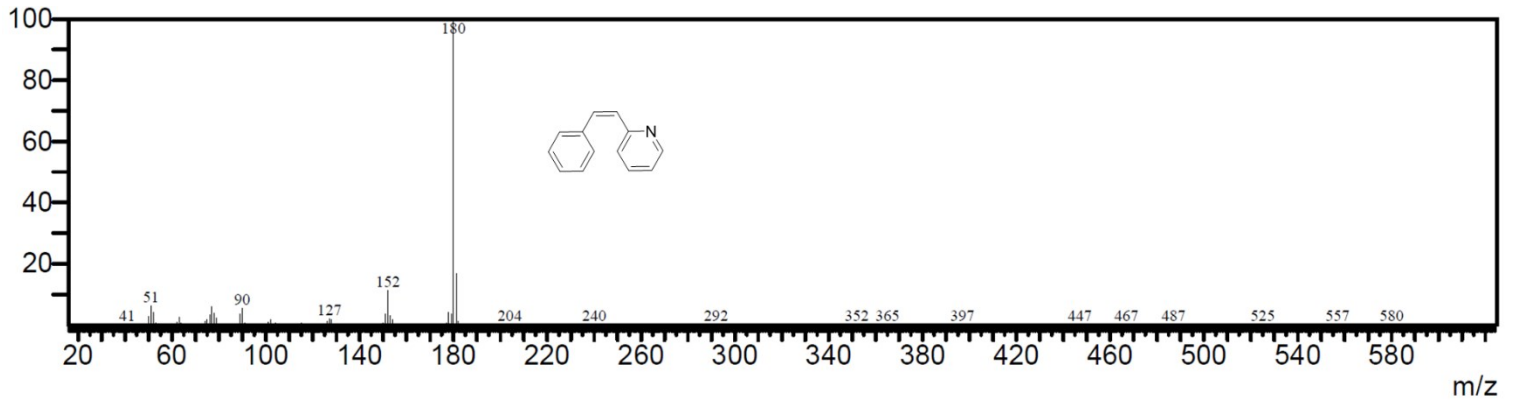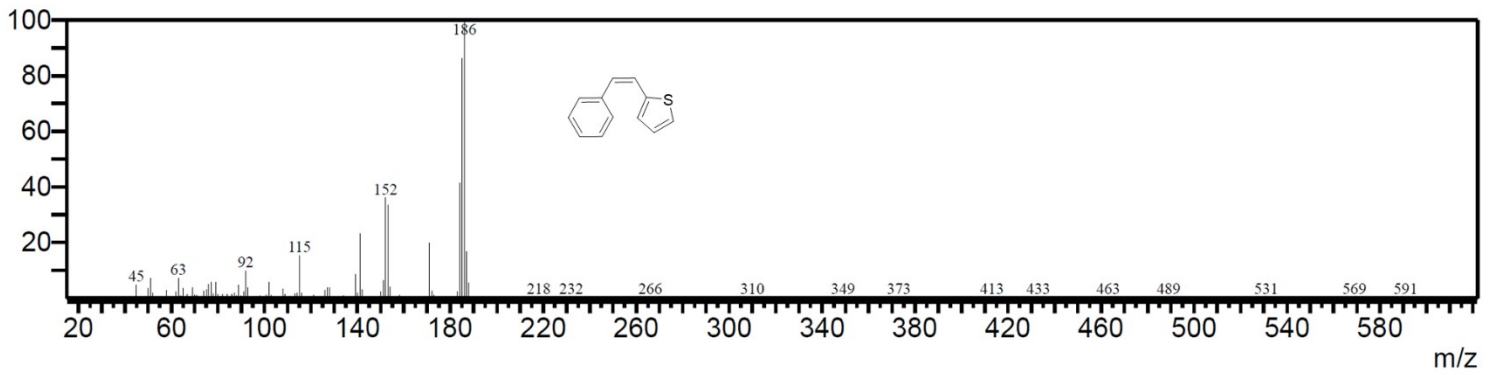

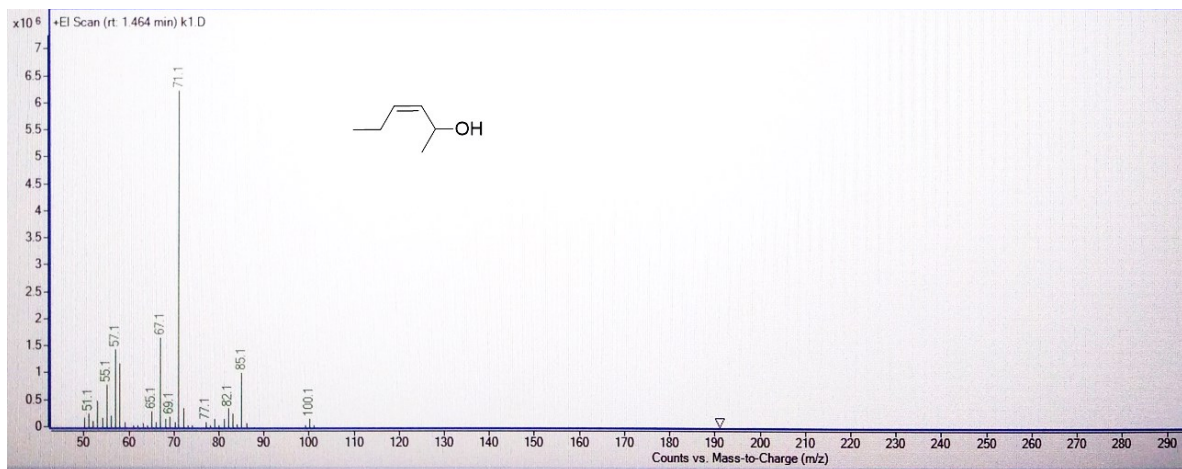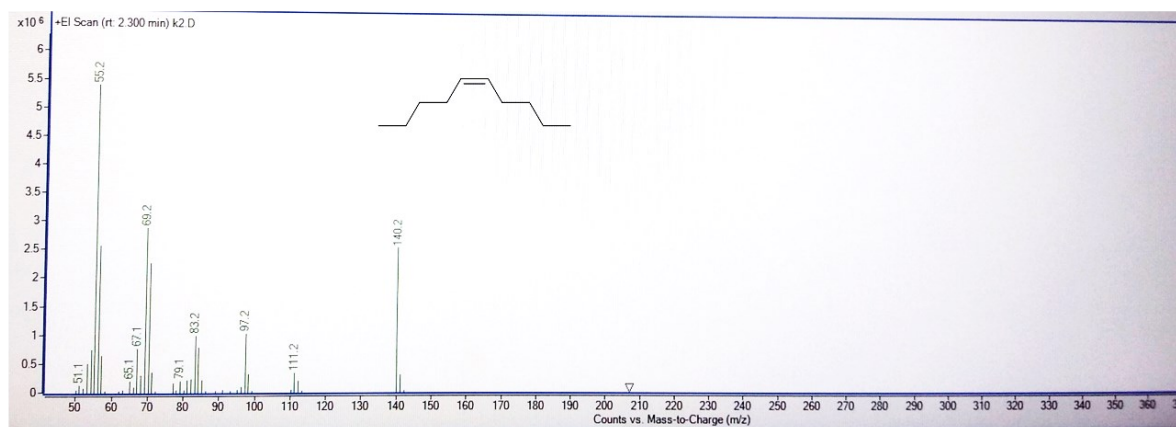



## SI-15. Spectra of semihydrogenated products

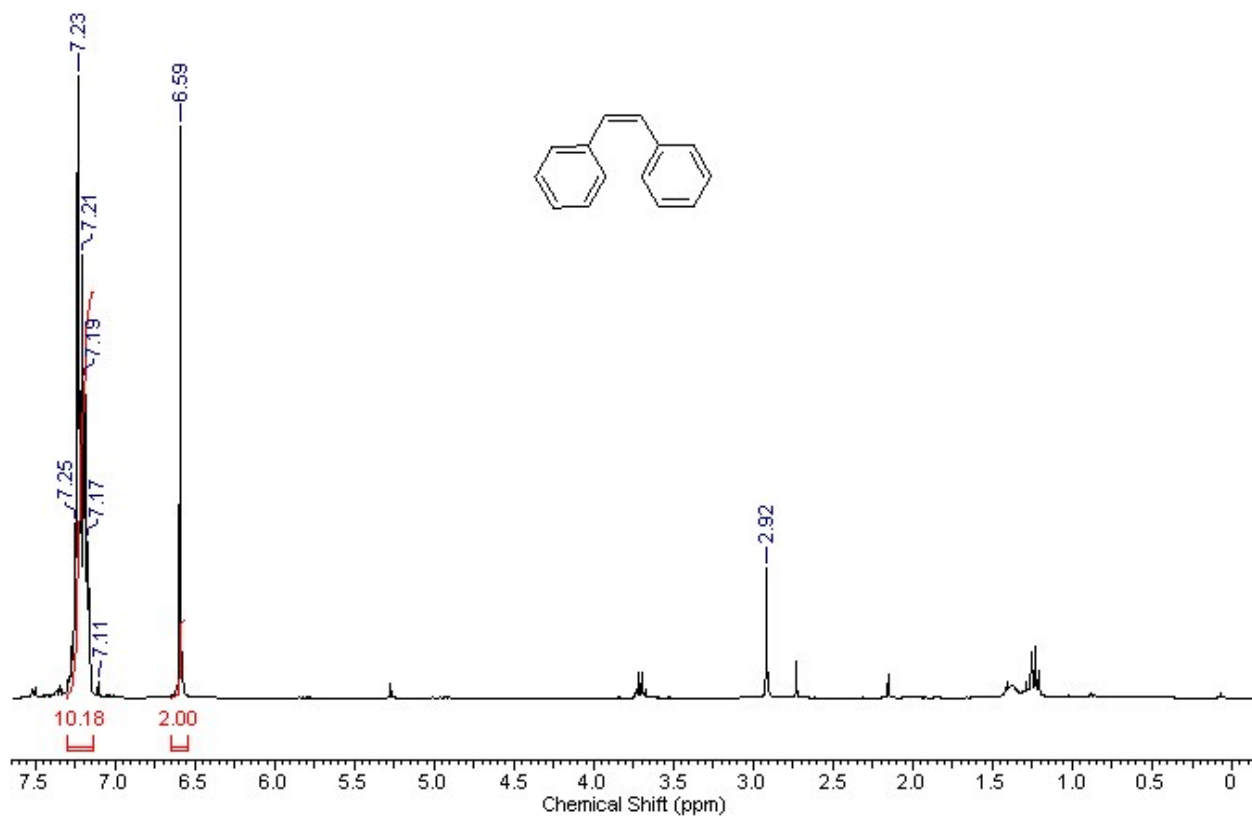

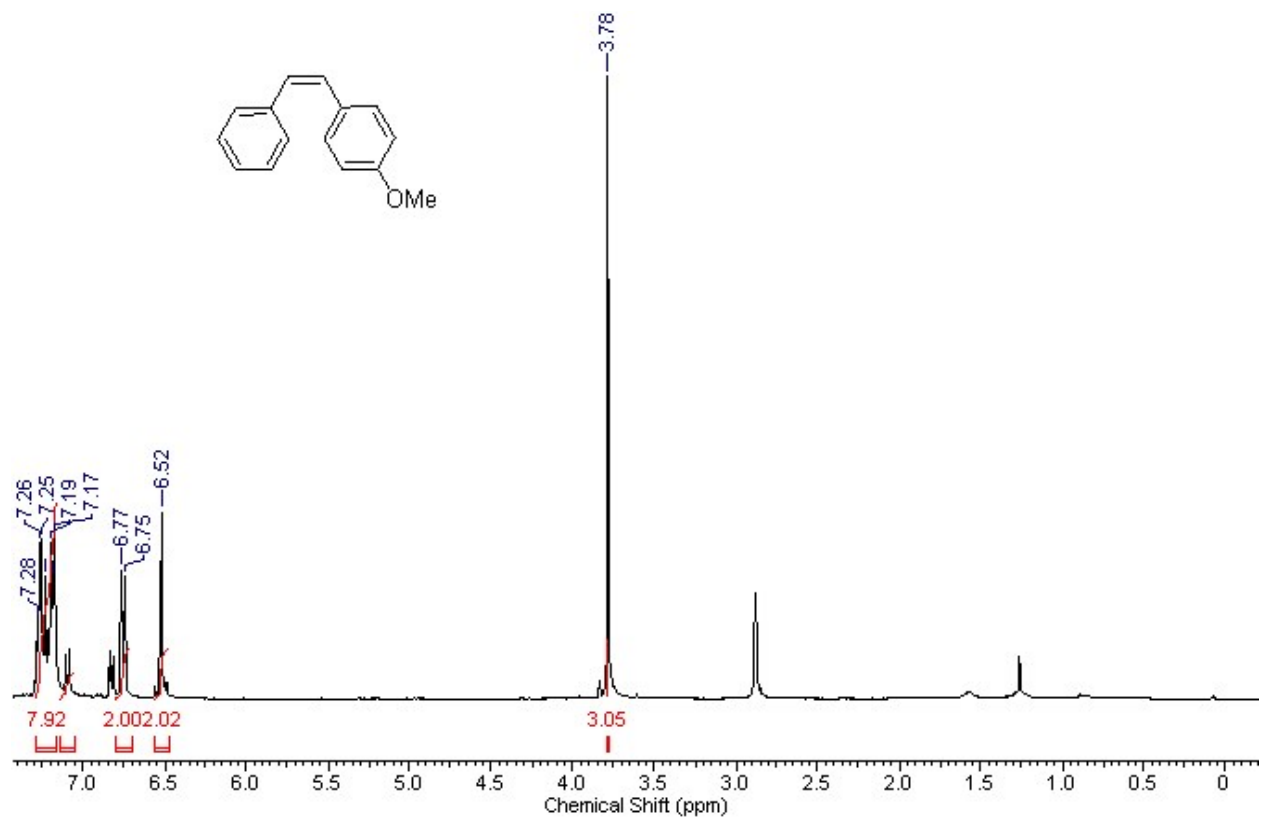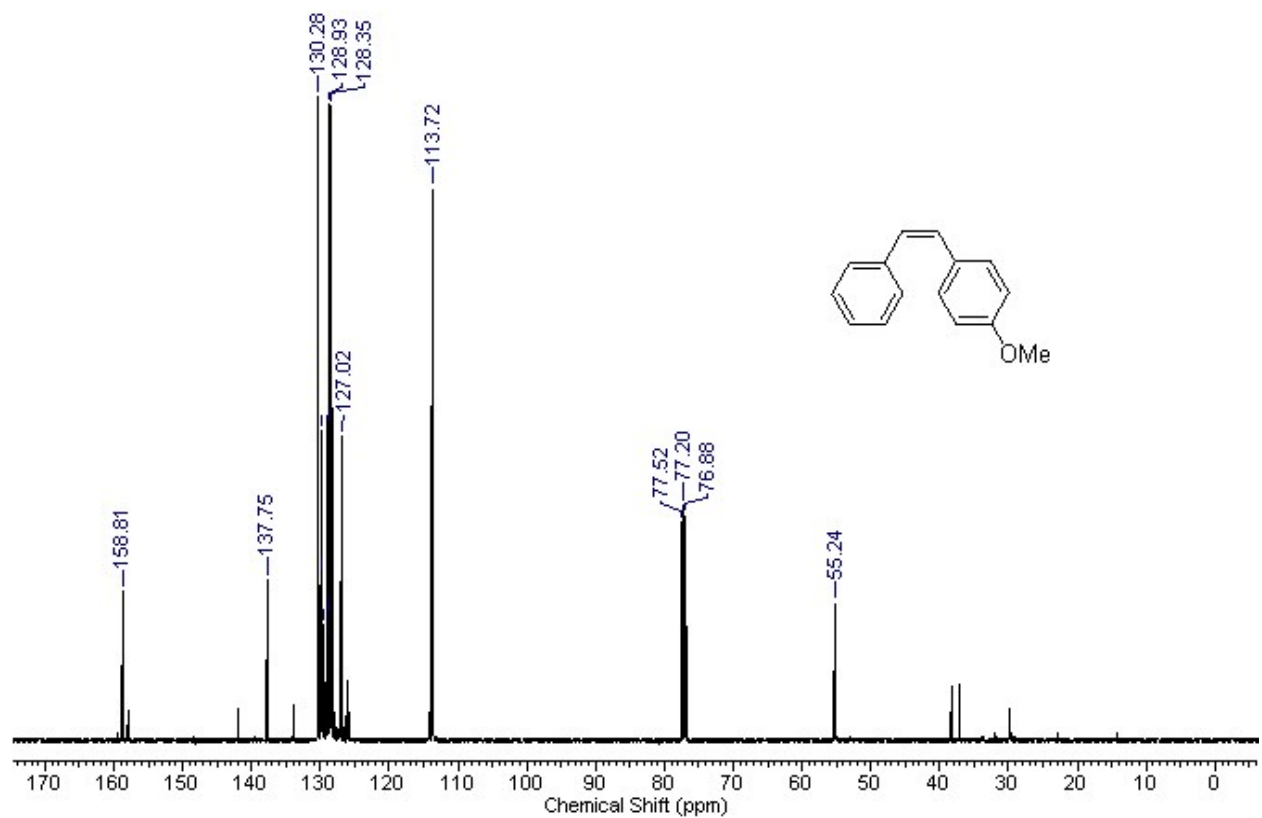

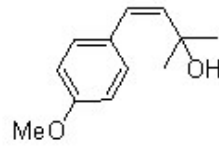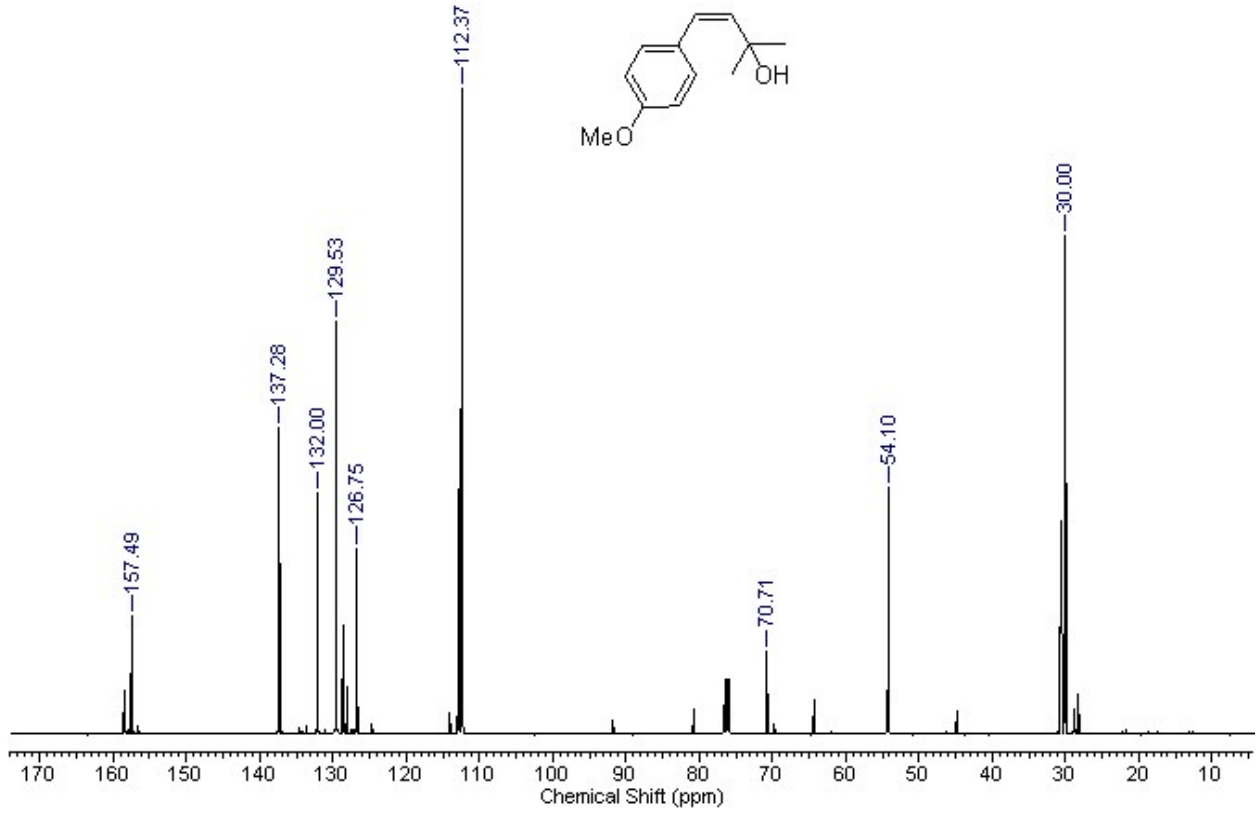

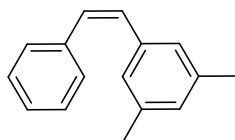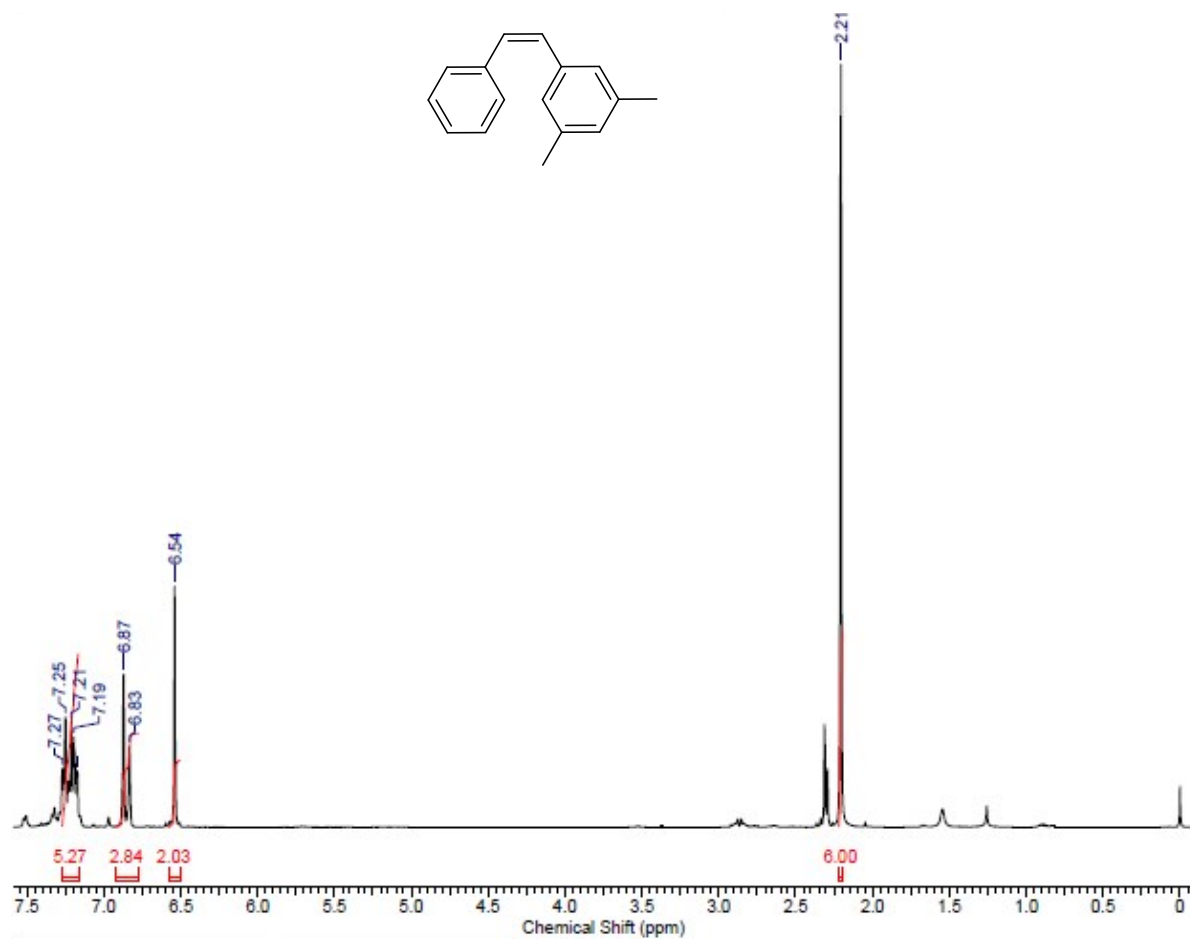

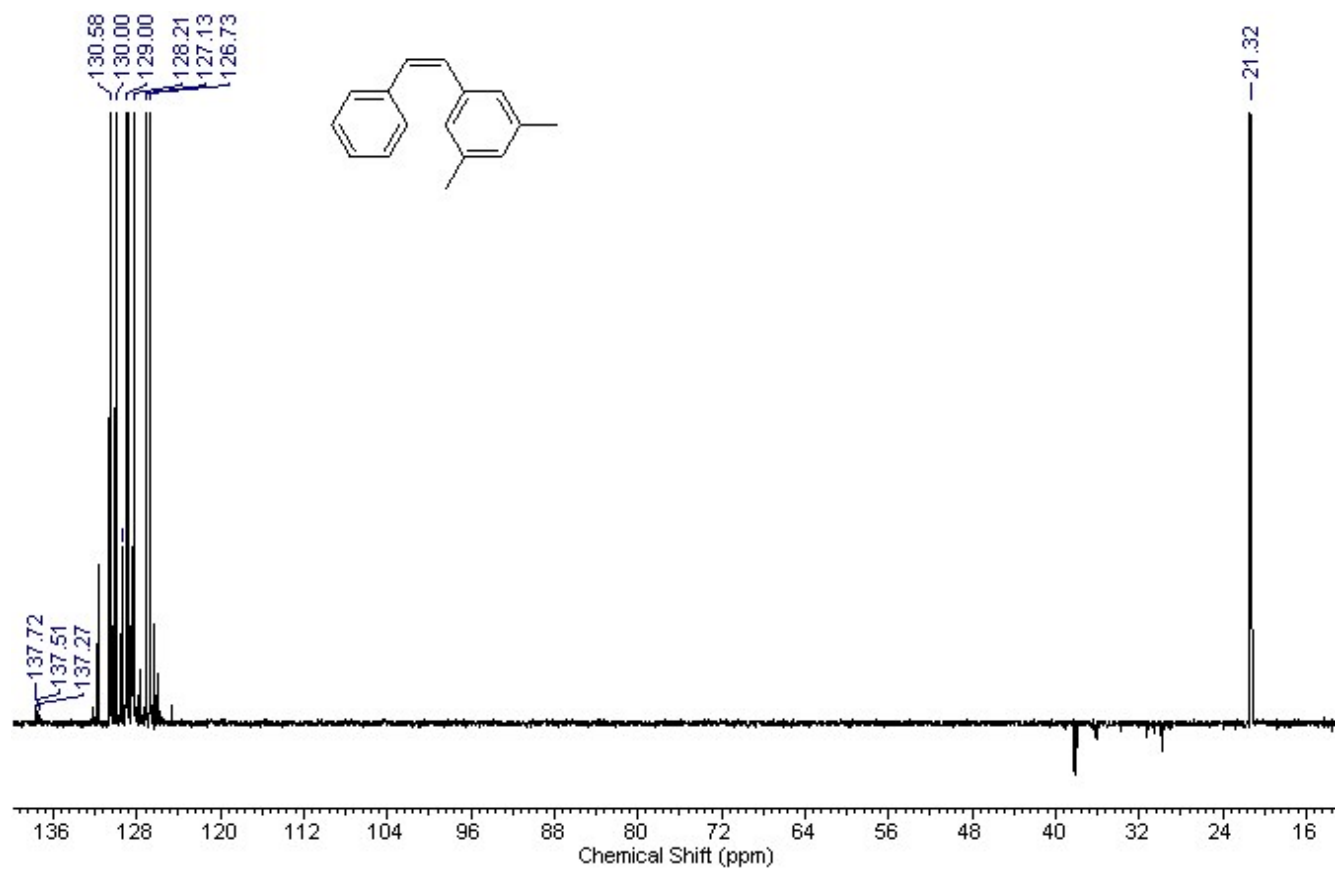

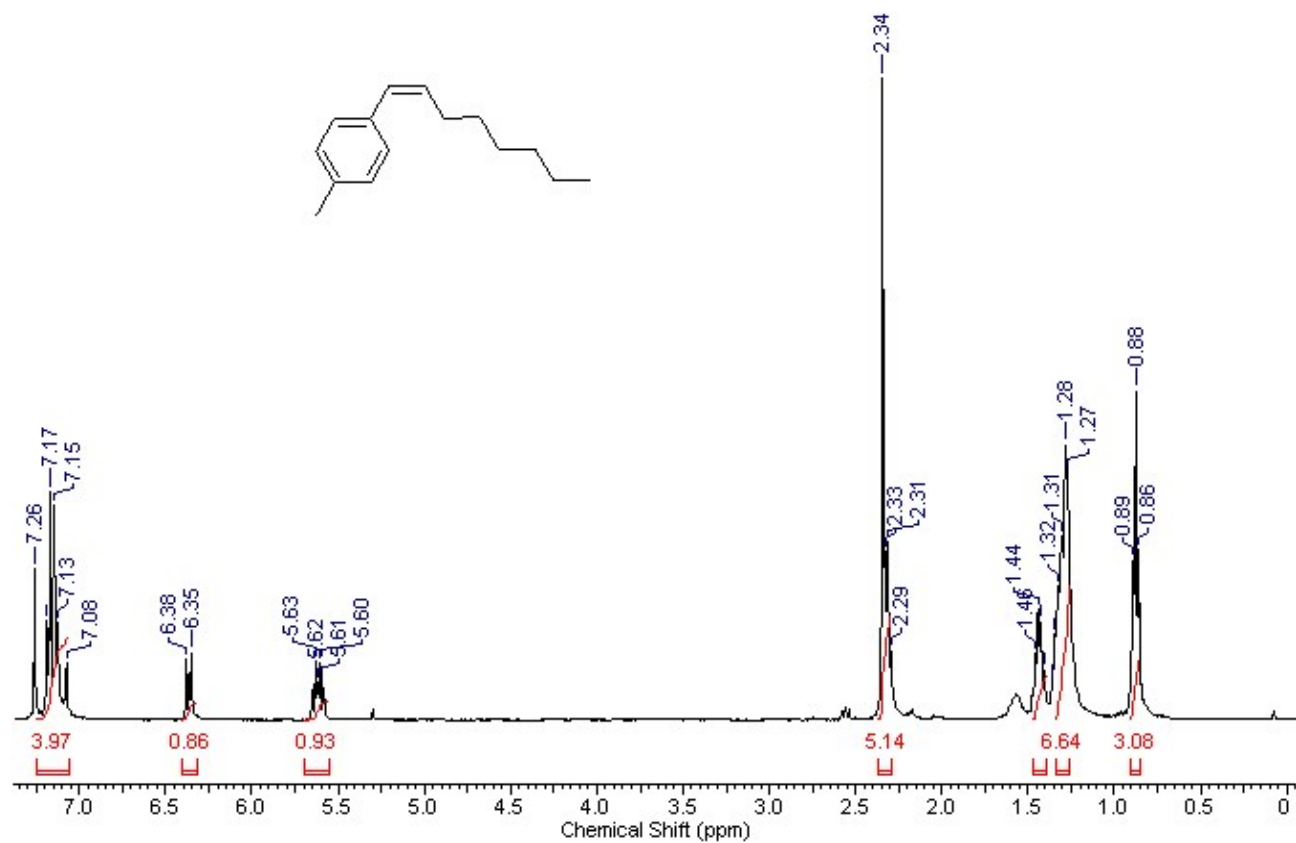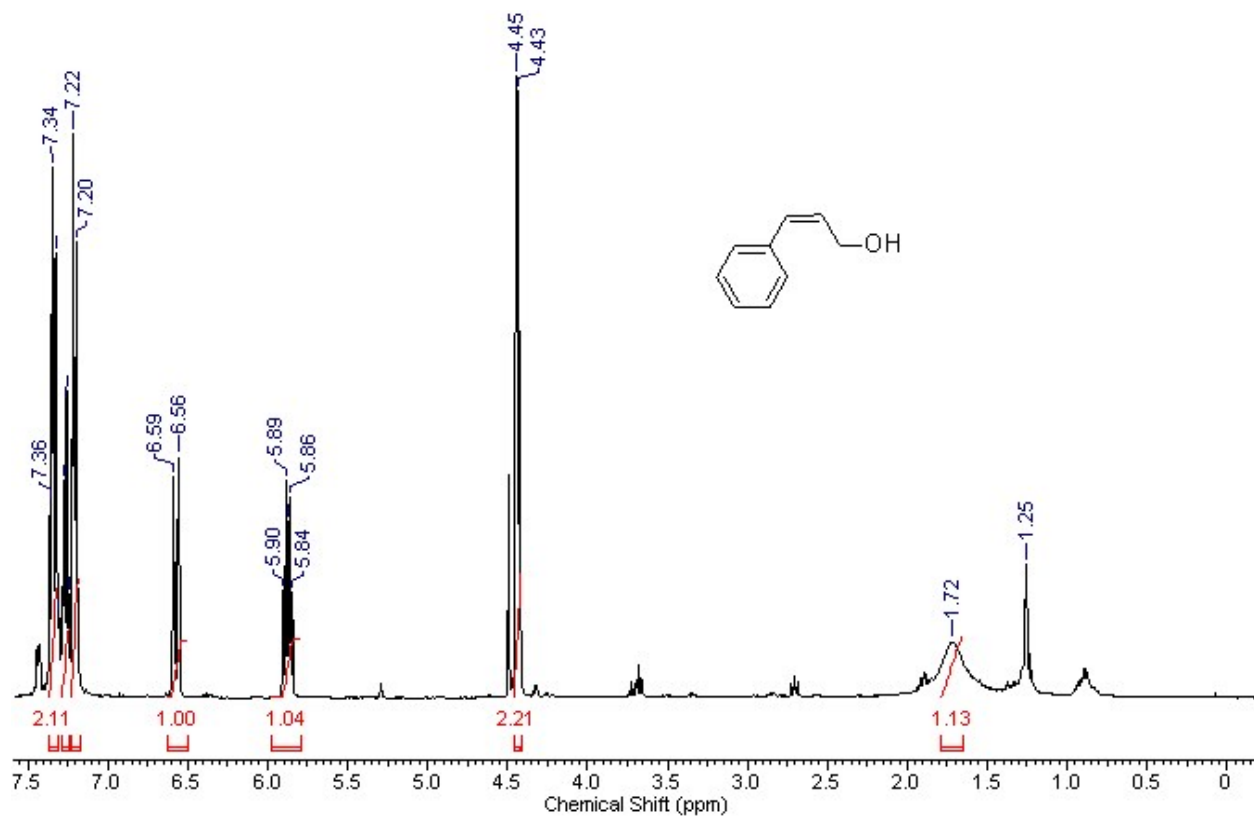

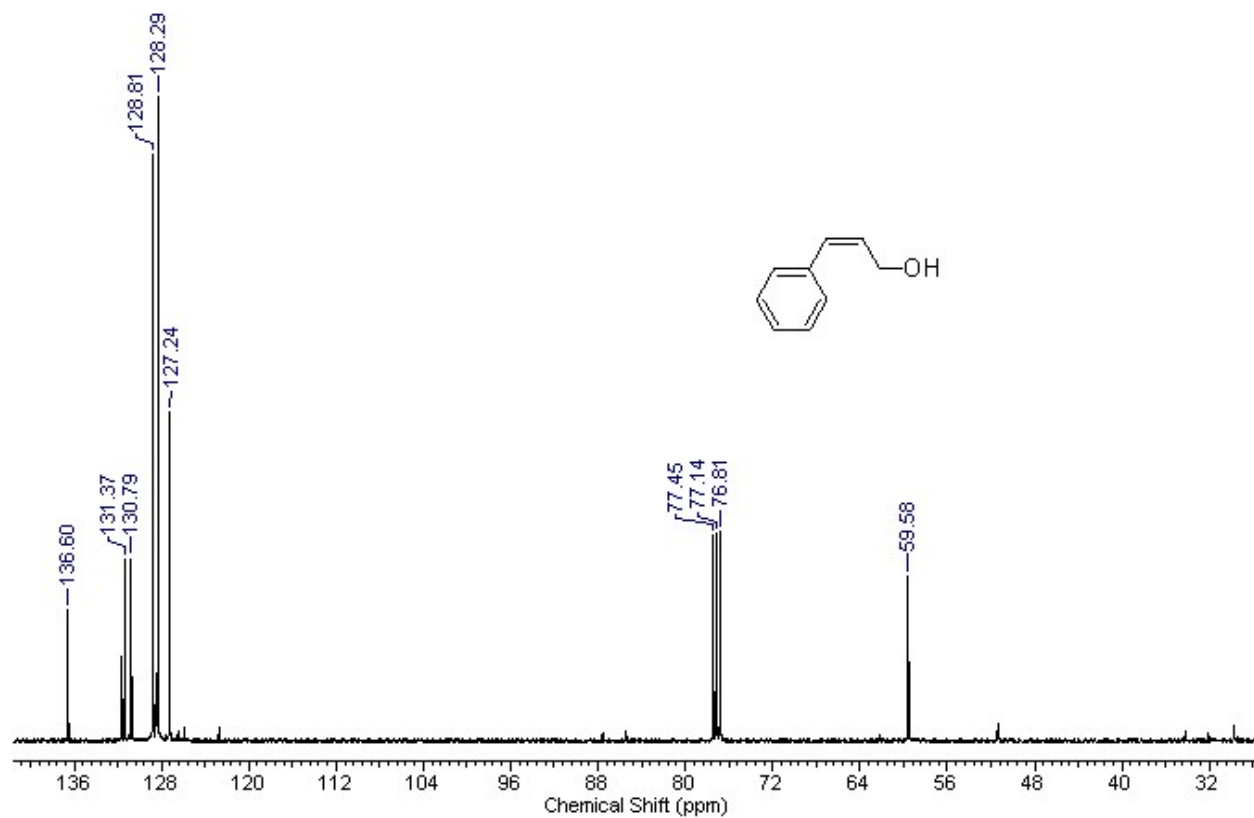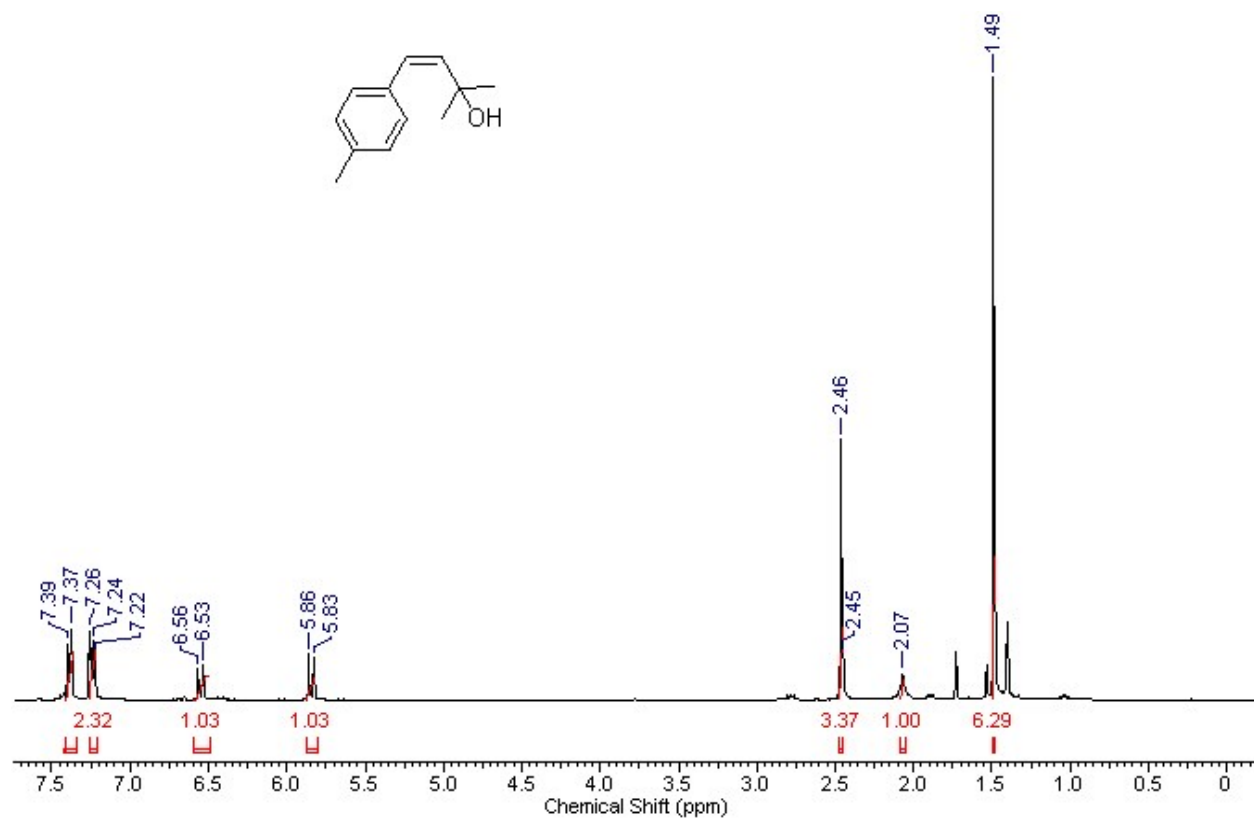

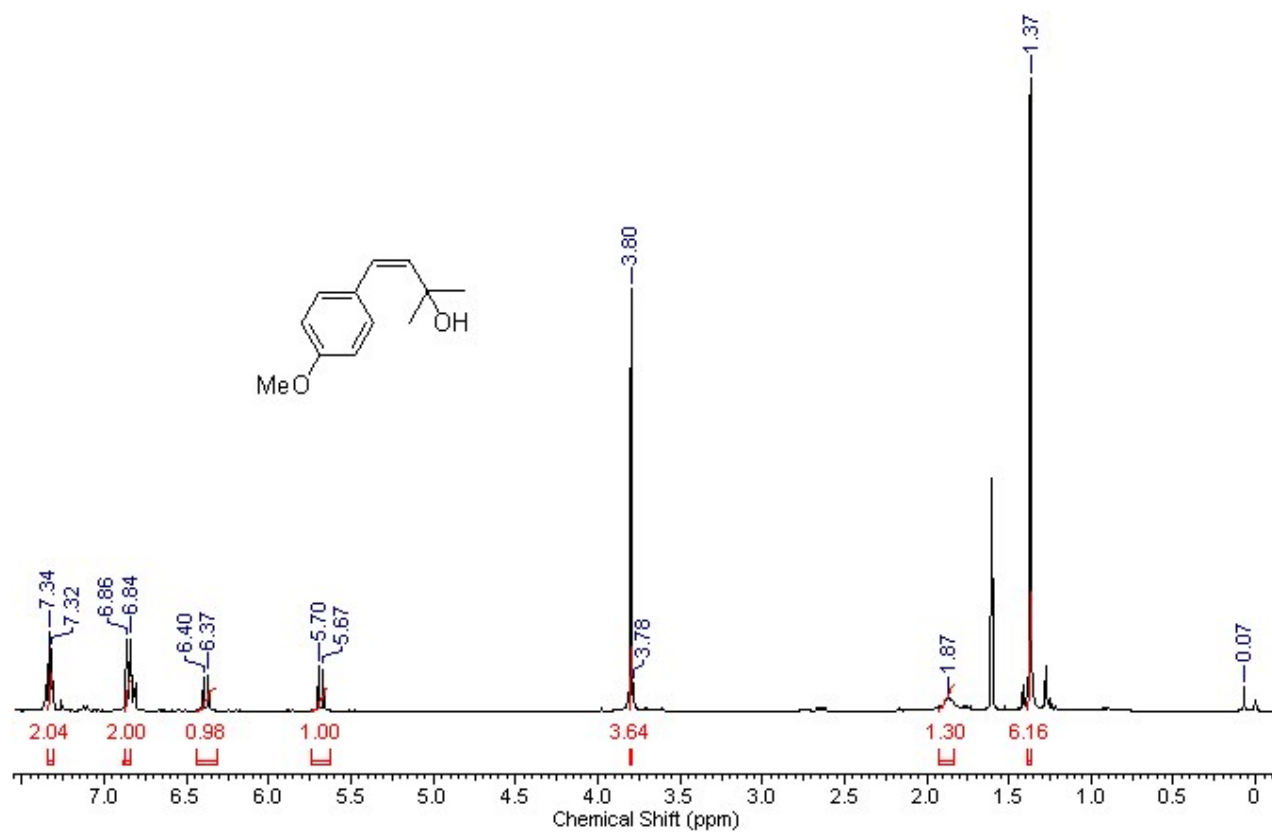



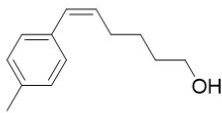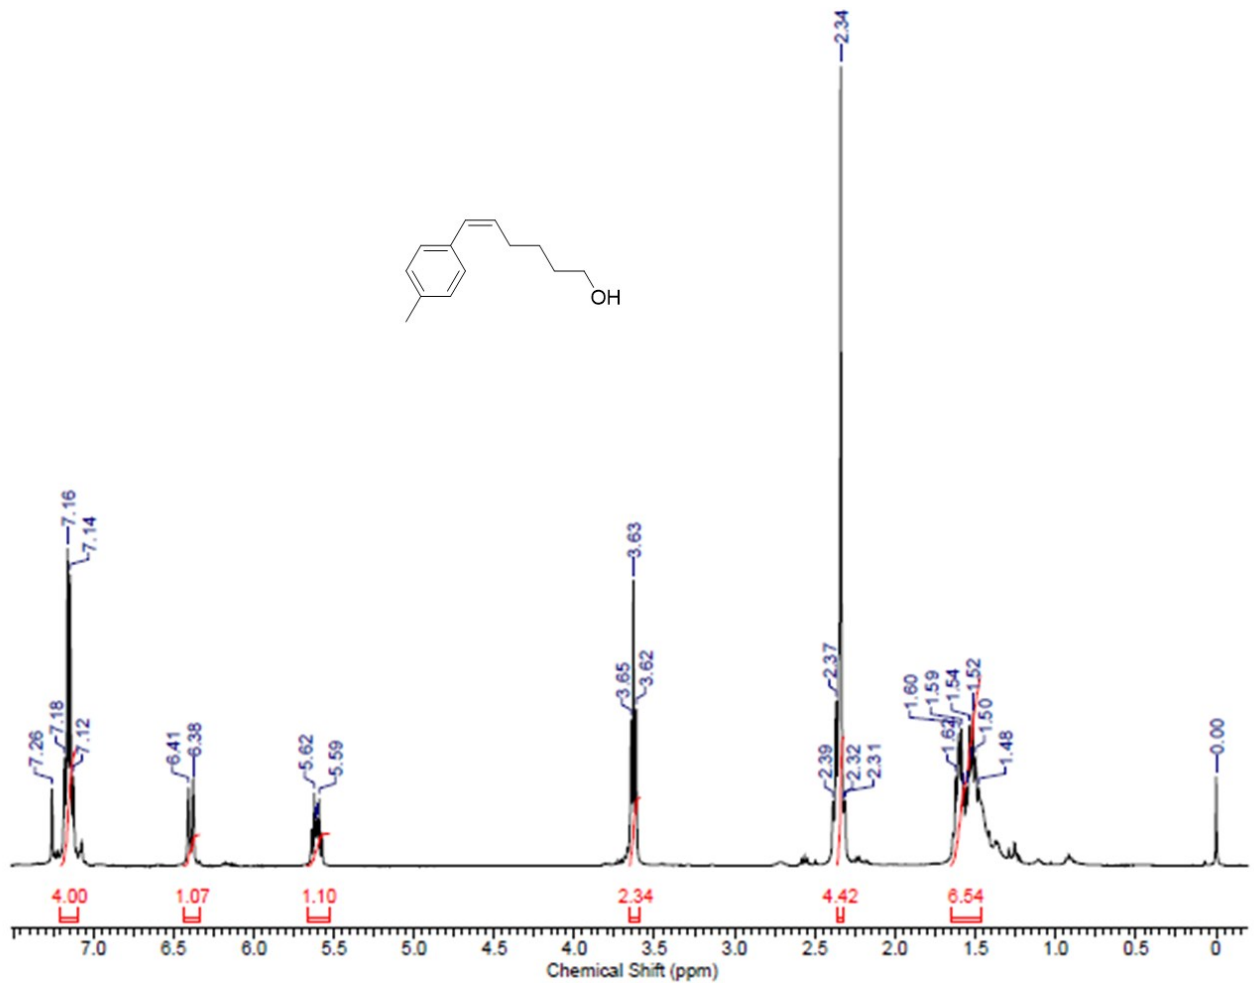

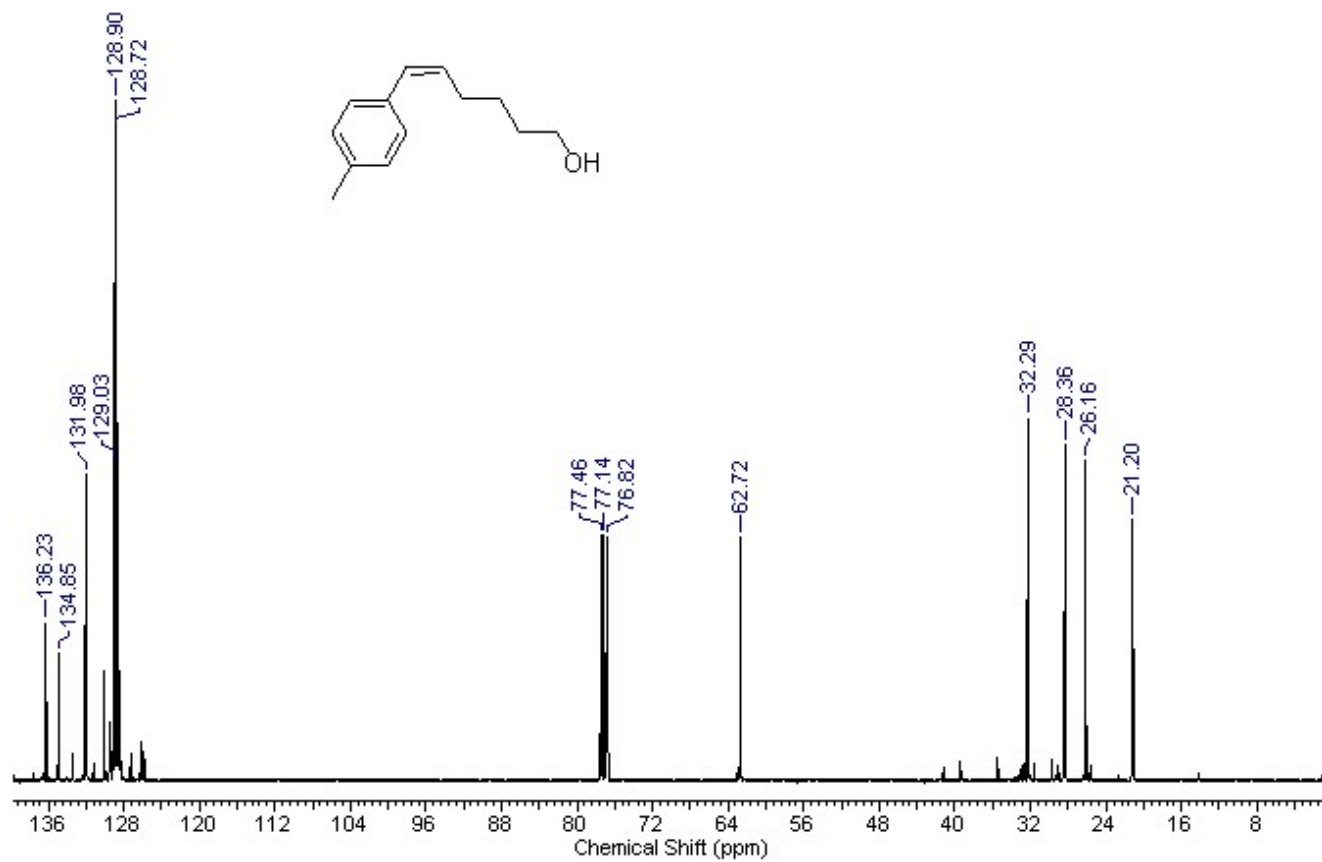

## SI-16. References

- S1 S. K. Singh, A. K. Singh, K. Aranishi and Q. Xu, *J. Am. Chem. Soc.*, 2011, **133**, 19638-19641.
- S2 B. Prabagar, S. Nayak, R. Prasad and A. K. Sahoo, *Org. Lett.*, 2016, **18**, 3066-3069.
- S3 Y.-F. Qiu, F. Yang, Z.-H. Qiu, M.-J. Zhong, L.-J. Wang, Y.-Y. Ye, B. Song and Y.-M. Liang, *J. Org. Chem.*, 2013, **78**, 12018-12028.
- S4 C. Chen, Y. Huang, Z. Zhang, X.-Q. Dong and X. Zhang, *Chem. Commun.*, 2017, **53**, 4612-4615.
- S5 Y. Liu, L. Hu, H. Chen and H. Du, *Chem. Eur. J.*, 2015, **21**, 3495-3501.
